# Supplementary material
Source: PubMed Central journal article supplement (PMC2662610)
Supplement: NIHMS87256-supplement-2a.pdf [file NIHMS87256-supplement-2a.pdf]

## Evaluation and Optimization of Method for Identification of Ginseng Species by HPTLC Fingerprint

### 1. Evaluation of existing methods and goal of the analysis:

Goals: Develop a fingerprint for the identification of Ginseng root as either *Panax ginseng*, *P. quinquefolium*, or *P. notoginseng* (*syn. P. pseudoginseng*). Ginsenoside Rb1, Rb2, Rc, Rd, Re, Rf, Rg1, and Rg2 are used as standards.

### 2. Methods from literature, paper review:

| Literature (see appendix)        | Scope / reference materials                                                             | Mobile phase / Stationary phase: TLC plate, Silica gel                                                                                                | Figure                                                   | Detection using       |
|----------------------------------|-----------------------------------------------------------------------------------------|-------------------------------------------------------------------------------------------------------------------------------------------------------|----------------------------------------------------------|-----------------------|
| USP/NF 20 2 <sup>nd</sup> suppl. | Escin and arbutin                                                                       | Ethyl acetate, water, 1-butanol (25:50:100), upper phase                                                                                              | 1a, 1b                                                   | Anisaldehyde solution |
| Ph.Forum 30(2)                   | American ginseng: 2D Chromatography using American and Asian ginseng reference extracts | 1—chloroform, methanol, water (13:7:2), lower phase.<br>2— Water, butyl alcohol, ethyl acetate (5:4:1), upper phase                                   | 1c                                                       | Anisaldehyde solution |
| Ph.Forum 30(2)                   | Asian ginseng: Escin and arbutin                                                        | As USP/NF 20                                                                                                                                          | 1a, 1b                                                   | Anisaldehyde solution |
| Pharmeuropa (15.3)               | Escin and arbutin                                                                       | As USP/NF 20                                                                                                                                          | 1a, 1b                                                   | Anisaldehyde solution |
| Chinese Ph.                      | Rb1, Re, Rg1                                                                            | Chloroform, ethyl acetate, methanol, water (15:40:22:10), store at 10°C, use lower layer                                                              | 1d                                                       | Anisaldehyde solution |
| Plant Drug Analysis, Wagner      | Rb1, Rb2, Rc, Rd, Re, Rg1, Rg2                                                          | Chloroform, methanol, water (70:30:4)                                                                                                                 | 1e                                                       | Vanillin solution     |
| JPC 15(2) 2002                   | Rb1, Re, Rg1                                                                            | Chloroform, methanol, water (65:50:10)                                                                                                                | 1f                                                       | Anisaldehyde solution |
| Modified Chinese Ph.             | All available ginsenosides                                                              | Chloroform, ethyl acetate, methanol, water (15:40:22:9)                                                                                               | 1g                                                       | Sulfuric acid reagent |
| Xie and Yan HRC&CC 10 (1987)     | Ginsenosides mixture                                                                    | Chloroform, ethyl acetate, methanol, water (15:40:22:10), store at 10°C overnight, use lower layer. Plate drying over P <sub>2</sub> O <sub>5</sub> . | Not performed (elaborate sample prep and chromatography) | Sulfuric acid reagent |

### 3. Material

Sample available:

| Sample Name                                      | Source / Lot | Authentication |
|--------------------------------------------------|--------------|----------------|
| Panax ginseng                                    | CAMAG        | Yes            |
| American Ginseng powder<br>(Panax quinquefolium) | CAMAG        | No             |
| Panax notoginseng                                | CAMAG        | Yes            |

Standards (marker compounds) available:

| Name            | Source                   |
|-----------------|--------------------------|
| Aescin          | Merck, K91050101 014     |
| Arbutin         | Phyto-Cal Inc., 007A-002 |
| Ginsenoside Re  | Pharmaton, K.H.08.95     |
| Ginsenoside Rf  | Pharmaton, K.H.08.95     |
| Ginsenoside Rd  | Pharmaton, K.H.08.95     |
| Ginsenoside Rg1 | Pharmaton, K.H.08.95     |
| Ginsenoside Rg2 | Pharmaton, K.H.08.95     |
| Ginsenoside Rb1 | Pharmaton, K.H.08.95     |
| Ginsenoside Rc  | Pharmaton, K.H.08.95     |
| Ginsenoside Rb2 | Pharmaton, K.H.08.95     |

Plates

| TLC plate                     | Size     | Source | Batch    |
|-------------------------------|----------|--------|----------|
| Glass plates HPTLC Si 60 F254 | 10x10 cm | Merck  | OB312657 |
| Glass plates HPTLC Si 60 F254 | 20x10 cm | Merck  | OB302430 |
| Glass plates TLC Si 60 F254   | 20x20 cm | Merck  | OB268992 |

Instruments and software

| Instrument              | Manufacturer   |
|-------------------------|----------------|
| Automatic TLC Sampler 4 | CAMAG          |
| DigiStore               | CAMAG          |
| TTC 20x20 cm            | CAMAG          |
| TTC 20x10 cm            | CAMAG          |
| TTC 10x10 cm            | CAMAG          |
| TLC Plate Heater III    | CAMAG          |
| Immersion Device III    | CAMAG          |
| Mill KB5/10             | IKA            |
| Centrifuge EBA21        | Hettich        |
| Ultrasonic Bath         | Telsonic TPC25 |
| Balance                 | Mettler-Toledo |

| Software | Manufacturer |
|----------|--------------|
| WinCATS  | CAMAG        |

## **4. Optimization of the method**

### **4.1 Mobile phase**

**Figure 1: Comparison of various mobile phases**

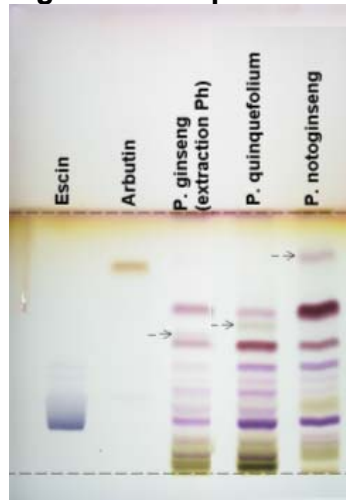

**1a, TLC plate**

USP/NF 20, 2<sup>nd</sup> suppl. (Asian ginseng), Ph. Forum 30(2) (Asian ginseng), and Pharmeuropa 15.3: **Developing time 2.5h**

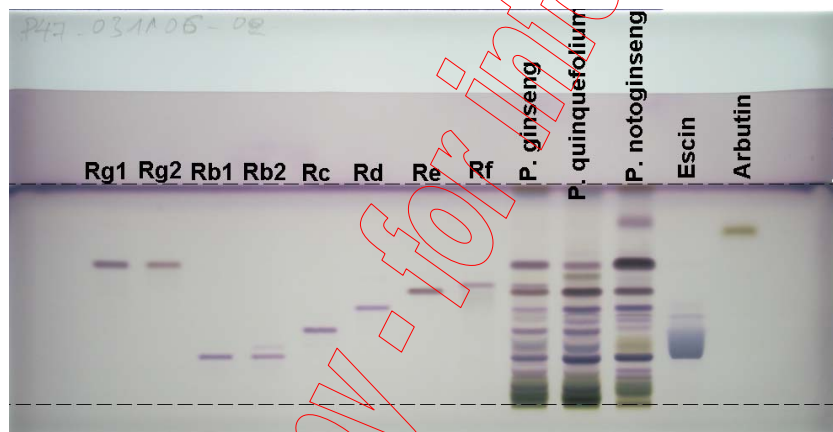

**1b, HPTLC plate**

Same as 1a, only change to HPTLC plate: **Developing time 1h**

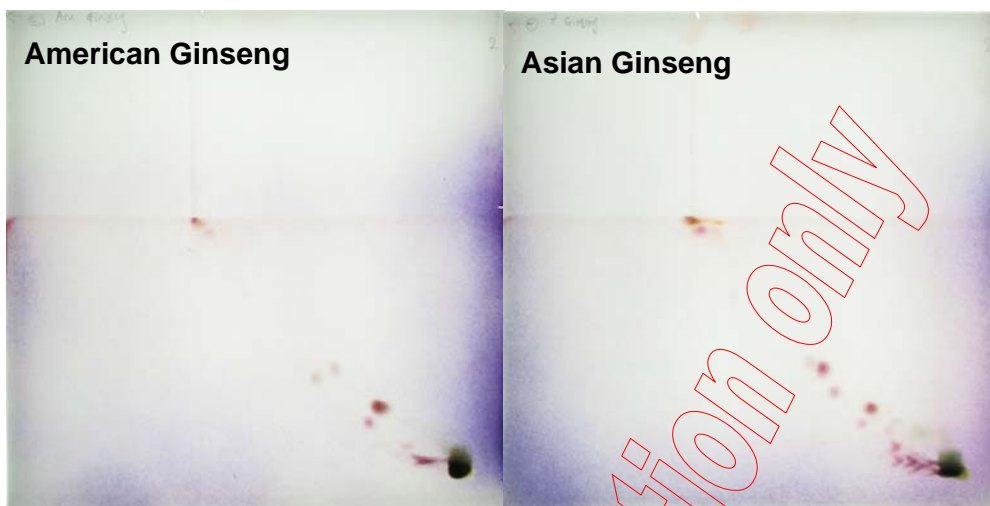

1c

Ph. Forum 30(2) (American ginseng), 2D chromatograms, **Developing time 45 min + 1h30 (TLC plate)**

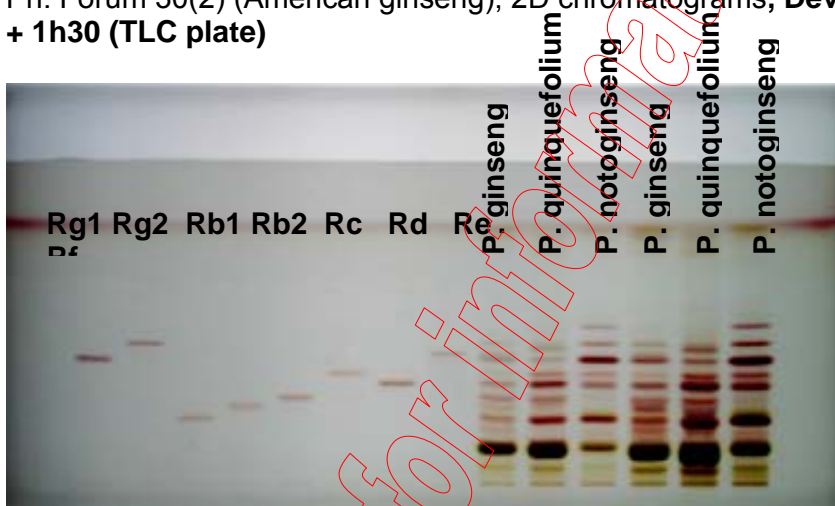

1d

Chinese Pharmacopoeia, **Developing time 20 min (HPTLC plate)**

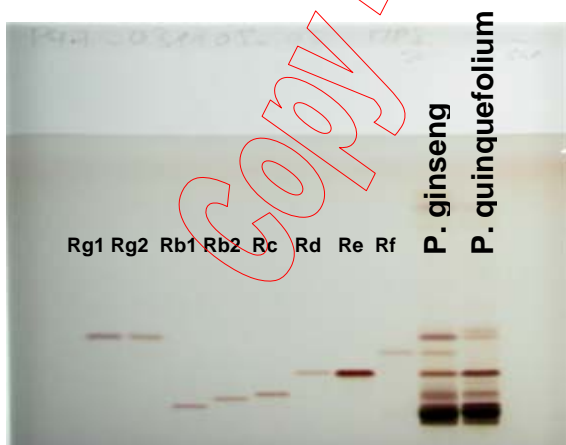

1e

Wagner TLC Atlas, **Developing time 20 min (HPTLC plate)**

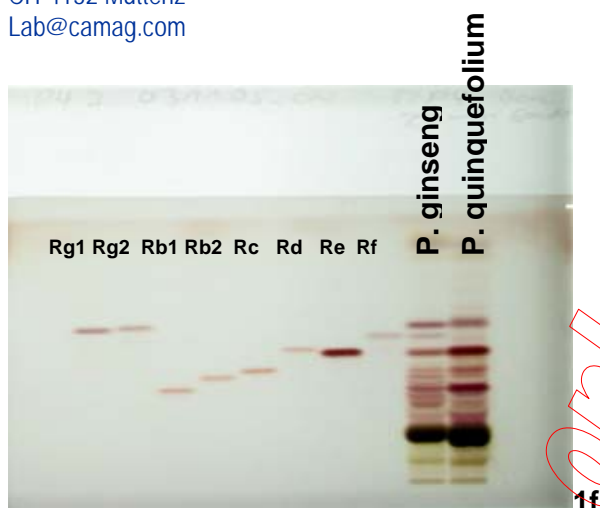

JPC, Developing time 20 min (HPTLC plate)

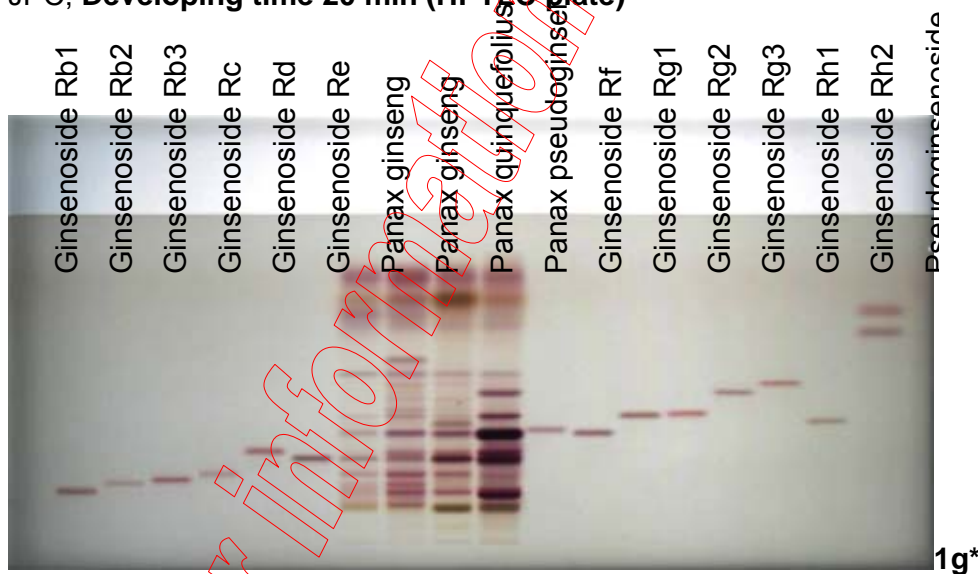

Modified Chinese Ph, 20 min (HPTLC plate)

\*The following mobile phase will be used: Chloroform, ethyl acetate, methanol, water (15:40:22:9)

#### **4.2 Extraction and application volume**

Different sample preparations were tested and results compared side by side after chromatography on HPTLC plate.

- 1 g of powdered drug is sonicated with 10 mL of methanol for 10 min and centrifuged. **Time required: 20 min**
- 1 g of powdered drug is sonicated with 10 mL of methanol-water (70:30) for 10 min and centrifuged. **Time required: 20 min**
- 1 g of powdered drug is sonicated with 10 mL of absolute ethanol for 10 min and centrifuged. **Time required: 20 min**
- 1 g of powdered drug is sonicated with 10 mL of ethanol-water (90:10) for 10 min and centrifuged. **Time required: 20 min**

- e) 1 g of powdered drug is refluxed in soxhlet with 50 mL of petroleum ether (40-60°C) for 3 h. Petroleum ether is discarded and residue dried. Next day, the residue is refluxed in soxhlet with 60 mL of methanol for 6 h. The methanol phase is dried (rotavap) and the residue dissolved in 10 mL of water. The water is extracted 2x with 20 mL of water-saturated butanol each. The butanol phases are combined and washed 2x with 5 mL of water each. Water phases are discarded (1 mL is kept for test: e1). Butanol is evaporated and the residue redissolved in 10 mL of methanol. **Time required: 12h**
- f) Method ChP: 1 g of powdered drug is refluxed with 40 mL of chloroform to defat. Solution is filtered and chloroform discarded. Residue is dried in air, then moistured with 0.5 mL of water and 10 mL of water-saturated butanol. This mixture is sonicated for 30 min. 3 mL of ammonia 25% are added and the solution mixed, then centrifuged. The supernatant is evaporated to dryness and redissolved in 1 mL of methanol. **Time required: 2h**
- g) Method ChP, without defating: 1 g of powdered drug moisturized with 0.5 mL of water and 10 mL of water-saturated butanol. This mixture is sonicated for 30 min. 3 mL of ammonia 25% are added and the solution mixed, then centrifuged. The supernatant is evaporated to dryness and redissolved in 1 mL of methanol. **Time required: 1h**

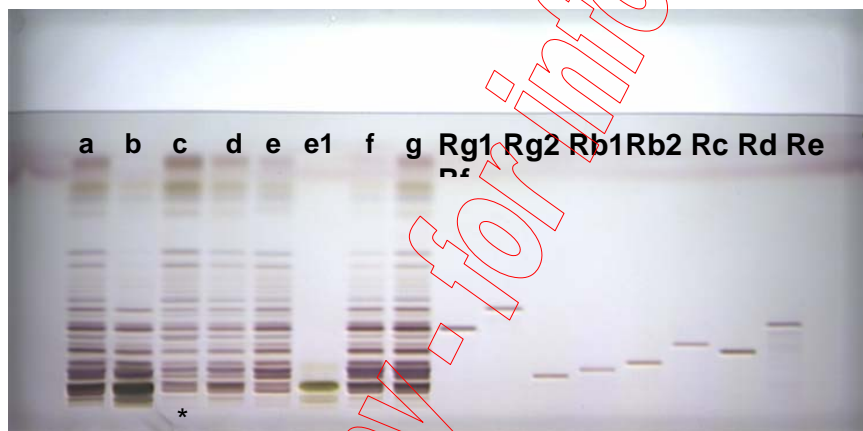

**Figure 2: Comparison of extraction methods**

Application volume: 15 µL of each sample solution

*\*Extraction will be performed as follows: 1 g of milled root is extracted by sonication with 10 mL of absolute ethanol for 10 min. The solution is centrifuged and the supernatant used as test solution. Application volume: 10µL are sufficient.*

#### **4.3 Derivatization**

Various derivatization reagents from the literature were tested.

Most methods require anisaldehyde reagent, which yields violet colored ginsenoside zones (Figure 3a). However, the plate background shows violet and yellow (daylight) or green (UV 366 nm) zones across the plate.

Derivatization with sulfuric acid reagent produce less colored zones in white light, but allows the differentiation of panaxadiol (blue) and panaxatriol (brownish) derivatives under UV 366 nm.

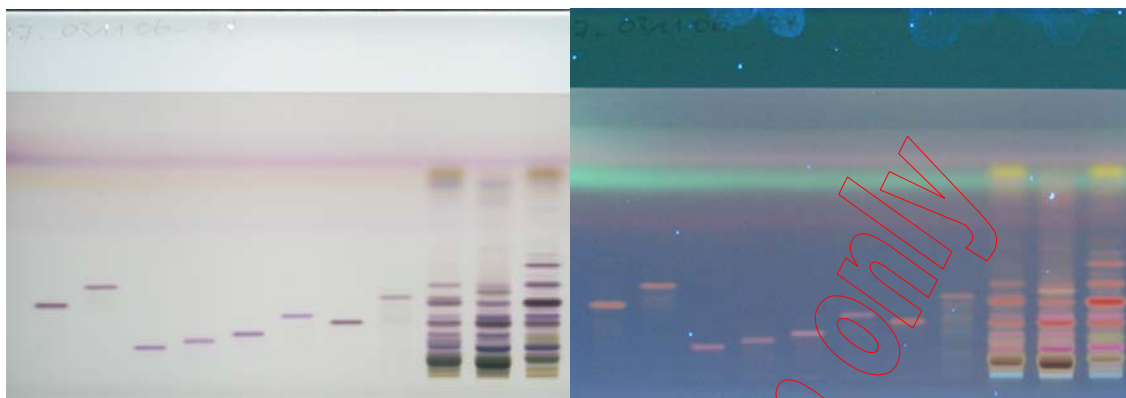

**Figure 3a: Derivatization with anisaldehyde reagent** (left: white light, right: UV 366 nm)

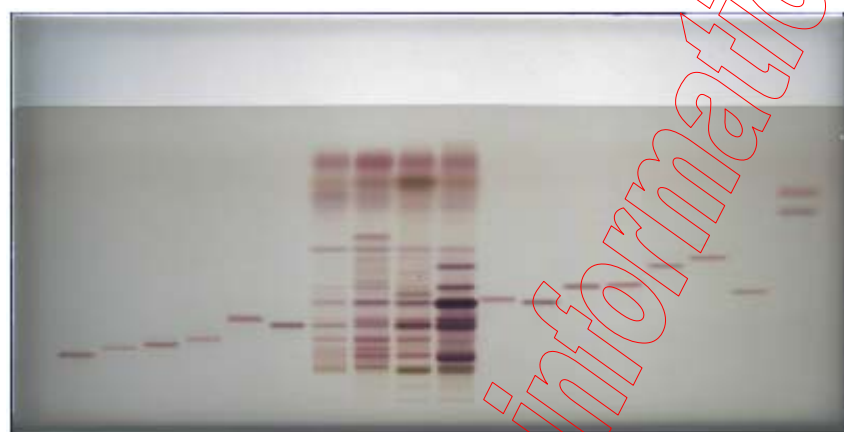

white light\*

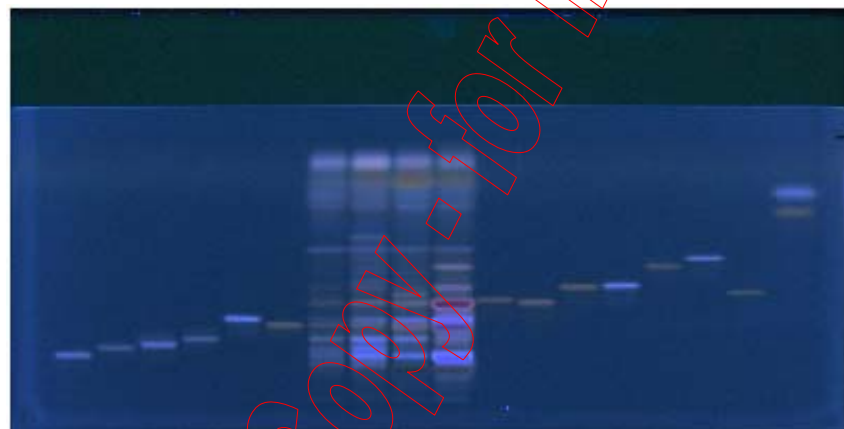

UV 366 nm\*

**Figure 3b: Derivatization with sulfuric acid reagent**

*\*Derivatization will be performed with sulfuric acid reagent.*

4.4 Developing distance

4.5 Stability of sample in the chromatographic system (2D chromatogram).

4.6 Stability of sample in solution and on the plate.

4.7 Influence of humidity/temperature/chamber conditioning.

4.8 Reproducibility of the method.

See Validation protocol.

#### **4. Written Procedure / Method to be validated**

##### **4.1 Preparation of test solutions**

1 g of powdered raw material is mixed with 10 mL of absolute ethanol, sonicated for 10 min, and centrifuged. The supernatant is used as test solution.

##### **4.2. Preparation of reference solutions**

**Botanical reference solution:** 1 g of powdered raw material is mixed with 10 mL of absolute ethanol, sonicated for 10 min, and centrifuged. The supernatant is used as reference solution.

**Chemical reference solutions:** 1 mg of each ginsenoside (Rb1, Rb2, Rb3, Rc, Rd, Re, Rf, Rg1, Rg2, Rg3, Rh1, Rh2), pseudoginsenoside F11, panaxadiol, and panaxatriol is dissolved in each 5 mL of methanol<sup>1</sup>.

##### **4.3. Preparation of derivatizing reagent**

Sulfuric acid reagent: 20 mL of sulfuric acid are carefully added to 180 ml of ice-cold methanol.

##### **4.4. Stationary phase**

10x10 cm (or 20x10 cm) glass plates HPTLC silica gel 60 F<sub>254</sub> (Merck).

##### **4.5 Sample application**

10 µL of test solution and 5 µL of standard are applied each as 8 mm bands, at least 2 mm apart, 8 mm from the lower edge and at least 15 mm from left and right edges of the plate.

##### **4.6 Temperature and Humidity**

Record temperature and humidity in the laboratory.

##### **4.7 Chromatography**

|                      |                                                                                                                       |
|----------------------|-----------------------------------------------------------------------------------------------------------------------|
| Chamber type:        | 10x10 cm (or 20x10 cm) Twin Trough Chamber                                                                            |
| Configuration:       | Saturated for 20 min (filter paper, wetted with developing solvent, in trough opposite to the plate)                  |
| Developing solvent:  | Chloroform, ethyl acetate, methanol, water (15:40:22:9),<br>10 mL (respectively 20 mL) developing solvent per trough. |
| Developing distance: | 80 mm from lower edge of plate (72 mm from application position)                                                      |
| Drying:              | 5 min with cold air (hair dryer)                                                                                      |

##### **4.8 Derivatization**

The plate is immersed into reagent for 1 s, then heated at 100°C for 5 min.

<sup>1</sup> Methanol is more common as solvent in other analytical techniques such as HPLC. Using methanol, the standards can also be used otherwise.



#### 4.9 Documentation

- a) After derivatization under white light
- b) After derivatization under UV 366 nm

#### 4.10 Images of chromatograms

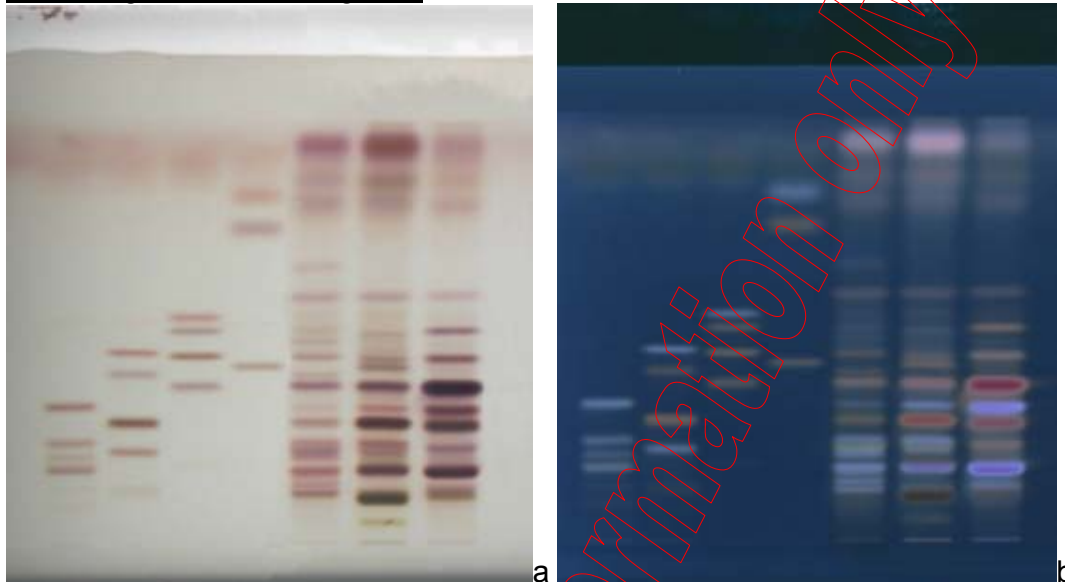

- 1: Ginsenosides Rb1, Rb2, Rc, Rd
- 2: Ginsenosides Rb3, Re, Rf, Rg3
- 3: Ginsenosides Rg1, Rg2, Rh1, Rh2
- 4: Pseudoginsenoside F11, panaxatriol, panaxadiol
- 5: *Panax ginseng* (Asian ginseng)
- 6: *Panax quinquefolium* (American ginseng)
- 7: *Panax notoginseng* (syn. *Panax pseudoginseng*)
