# Supplementary material
Source: PubMed Central journal article supplement (PMC2662610)
Supplement: NIHMS87256-supplement-3b.pdf [file NIHMS87256-supplement-3b.pdf]

## **Validation of Method for Identification of Eleuthero by HPTLC Fingerprint**

### **1. Purpose of method to be validated**

The method for the identification of Eleuthero by HPTLC fingerprint is suitable to identify a given sample of plant material as Eleuthero root (*Eleutherococcus senticosus* syn. *Acanthopanax senticosus*) based on the separation of Eleutherosides E, B, and E1 (lignan fingerprint).

Adulterants, such as *Periploca sepium*, show a different profile and can be recognized.

The method is also applicable for identification of extracts and finished products as derived from Eleuthero root (*Eleutherococcus senticosus*), provided that the material was made from a single herb and intended to contain the constituent profile seen in Eleuthero.

### **2. General acceptance criteria**

The method is valid if:

- A botanically authenticated sample of *Eleutherococcus senticosus* yields a fingerprint which is similar to that shown in section 4.10 of the method with respect to number, position, color, and intensity of bands **and**
- All acceptance criteria specified in sections 5.2 to 5.6 are met **and**
- Any deviation from the expected result doesn't exceed those deviations seen under section 5.7 (Robustness).

### **3. Personnel**

#### **3.1 Study director**

Name: Eike Reich  
Company: CAMAG  
Address: Sonnenmattstrasse 11  
City: Muttenz, CH 4132  
Phone: (41) 61 467 3434  
Fax: (41) 61 461 0702  
E-mail: eike.reich@camag.com

#### **3.2 Analyst of primary lab**

Name: Anne Schibli  
Company: CAMAG  
Address: Sonnenmattstrasse 11  
City: Muttenz, CH 4132  
Phone: (41) 61 467 3434  
Fax: (41) 61 461 0702  
E-mail: anne.schibli@camag.com

#### **3.3 Analyst of confirmatory lab**

Name: Alison DeBatt  
Company: CAMAG Scientific Inc.  
Address: 515 Cornelius Harnett Drive  
City: Wilmington, N.C, 28401  
Phone: (910) 343 1830  
Fax: (910) 343 1834  
E-mail: tlc@camagusa.com

#### **4. Description of method to be validated**

##### **4.1 Preparation of test solutions**

1 g of milled root (or enough product equivalent to that amount) is sonicated for 10 min with 5 mL ethanol-water 1:1. The solution is centrifuged and the supernatant is used as test solution.

Liquid samples are used neat.

##### **4.2 Preparation of reference solutions**

Botanical reference solution: as 4.1

Chemical reference solutions: 1 mg of each eleutheroside (B, E, E1) is dissolved in 1.5 mL ethanol-water 1:1.

##### **4.3 Preparation of derivatizing reagent**

Sulfuric acid reagent: 20 mL sulfuric acid are carefully added to 180 ml ice-cold methanol.

##### **4.4 Stationary phase**

10x10 cm (or 20x10 cm) glass plates HPTLC silica gel 60 F<sub>254</sub> (Merck).

##### **4.5 Sample application**

10 µL of test solution(s) and of botanical reference solution and 2 µL of chemical reference solutions are applied each as 8 mm bands, at least 2 mm apart, 8 mm from the lower edge and at least 15 mm from left and right edges of the plate. The application volume of neat liquid samples can be reduced to 2-5 µL.

##### **4.6 Temperature and Humidity**

Record temperature and humidity in the laboratory.

##### **4.7 Chromatography**

Chamber type: 10x10 cm (or 20x10 cm) Twin Trough Chamber  
Configuration: Saturated for 20 min (wetted filter paper in trough opposite to the plate)  
Developing solvent: Chloroform, methanol, water (70:30:4), 5 mL (respectively 10 mL) developing solvent per trough.  
Developing distance: 70 mm from lower edge of plate (62 mm from application position)  
Drying: 5 min with cold air (hair dryer)

##### **4.8 Derivatization**

The plate is immersed into reagent for 1 s, then heated at 100°C for 5 min.

##### **4.9 Documentation**

- a) Prior to derivatization under UV 254 nm
- b) After derivatization under white light (reflection and transmission)

#### 4.10 Images of chromatograms

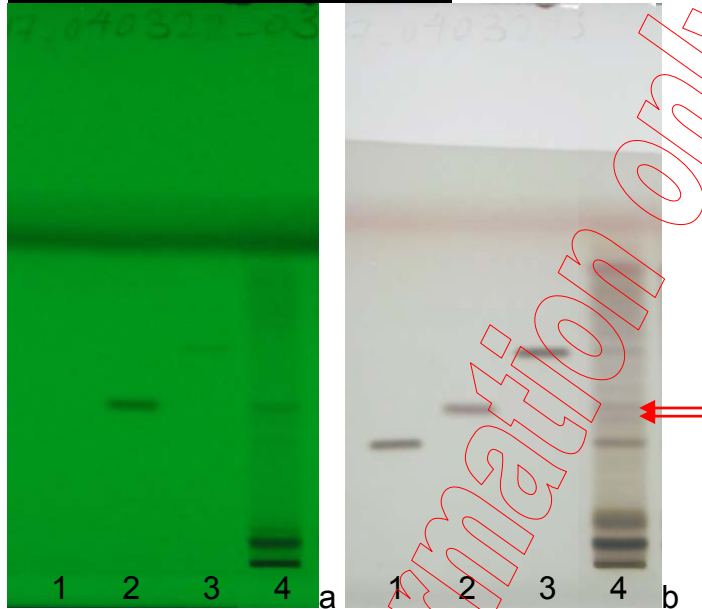

1. Eleutheroside E
2. Eleutheroside B
3. Eleutheroside E1
4. Eleuthero root

#### 4.11 Evaluation of results:

##### UV 254 nm

The reference substance eleutheroside B (Lane 2,  $R_f=0.45$ ) appears as a dark band. A fainter band for eleutheroside E1 is also seen (Lane 3,  $R_f=0.60$ ). Eleutheroside E (Lane 1) is not seen using this method of detection. A band matching eleutheroside B is seen in the sample. A dark band just above the application position is also seen in the sample.

##### White light

The reference substance eleutheroside E (Lane 1,  $R_f=0.34$ ), eleutheroside B (Lane 2,  $R_f=0.45$ ), and eleutheroside E1 (Lane 3,  $R_f=0.60$ ) appear as brown bands. The sample shows bands corresponding to eleutherosides E, B, and E1, two very strong bands near the application, and reddish zones near the front. Additional brownish-purple zones are seen.

#### 4.12 System suitability test:

The result obtained in the test is suitable for evaluation if the following requirement is met. After derivatization the fingerprint of the test solution shows a zone corresponding to eleutheroside B and another zone directly below. These two zones appear as two distinct bands, see arrows in Fig. 4.10

## 5. Validation

### 5.1 Materials

#### 5.1.1 Chemicals and solvents

| Name                 | Manufacturer                             | Quality |
|----------------------|------------------------------------------|---------|
| Ethanol              | Merck                                    | p.a     |
| Methanol             | Merck and Acros                          | p.a     |
| Chloroform           | Merck                                    | p.a     |
| Sulfuric acid 95-97% | Merck                                    | p.a     |
| Water                | In house demineralization (Ion exchange) | --      |

#### 5.1.2 Samples and Reference materials

##### Botanical reference material

| Sample Name              | Source / Lot                      | Authentication |
|--------------------------|-----------------------------------|----------------|
| Eleuthero Root, shredded | Removed - proprietary information | yes            |

##### Additional samples

| Sample Name                  | Source                            | Authentication |
|------------------------------|-----------------------------------|----------------|
| Siberian Ginseng Whole Root* | Removed - proprietary information | yes            |
| Siberian Ginseng Root Bark*  |                                   | yes            |
| Siberian Ginseng Inner Root* |                                   | yes            |
| Siberian Ginseng Whole Root  |                                   | yes            |
| Siberian Ginseng Inner Root  |                                   | yes            |
| Siberian Ginseng Whole Root  |                                   | yes            |
| Siberian Ginseng Whole Root  |                                   | No             |
| Siberian Ginseng Whole Root  |                                   | No             |
| Siberian Ginseng Whole Root  |                                   | No             |
| Siberian Ginseng Root slices |                                   | No             |

\* Different parts of the same root

##### Adulterants

| Sample Name                | Source                            | Authentication |
|----------------------------|-----------------------------------|----------------|
| Periploca sepium Root Bark | Removed - proprietary information | No             |
| Periploca sepium Root Bark |                                   | Yes            |

##### Processed materials

| Name                       | Source                            | Notes                                                                                              |
|----------------------------|-----------------------------------|----------------------------------------------------------------------------------------------------|
| Powdered Eleuthero Extract | Removed - proprietary information | USP reference standard, 2 bottles of same lot.                                                     |
| Siberian ginseng tincture  |                                   | No ratio given, water/alcohol                                                                      |
| Siberian ginseng tincture  |                                   | Dry herb menstrum ratio 2:1, 32-34% organic dry grain alcohol, custom wildcrafted eleutherococcus. |

|                           |                                         |                                                 |
|---------------------------|-----------------------------------------|-------------------------------------------------|
| Siberian ginseng tincture | Removed -<br>proprietary<br>information | 40% alcohol/water                               |
| Siberian ginseng tablet   |                                         | Also contains licorice root                     |
| Siberian ginseng tea bag  |                                         | No data                                         |
| Siberian ginseng capsule  |                                         | 5:1 concentration root extract powder           |
| Siberian ginseng tincture |                                         | No data                                         |
| Siberian ginseng tincture |                                         | 30-35% grain alcohol, water, vegetable glycerin |

Standards (marker compounds, chemical references)

| Name             | Source              |
|------------------|---------------------|
| Eleutheroside B  | ChromaDex 05060-101 |
| Eleutheroside E  | ChromaDex 05065-101 |
| Eleutheroside E1 | ChromaDex 05064-101 |

5.1.3 Plates

| TLC plate                     | Size     | Source | Batch              |
|-------------------------------|----------|--------|--------------------|
| Glass plates HPTLC Si 60 F254 | 10x10 cm | Merck  | OB291342, OB464935 |
| Glass plates HPTLC Si 60 F254 | 20x10 cm | Merck  | OB302430, OB475743 |

5.1.4 Instruments

| Instrument                      | Manufacturer   | Serial Number |
|---------------------------------|----------------|---------------|
| Automatic TLC Sampler 4         | CAMAG          | 061104        |
| DigiStore using Canon G5 camera | CAMAG          | 070705        |
| TTC 20x10 cm                    | CAMAG          | n. a.         |
| TTC 10x10 cm                    | CAMAG          | n. a.         |
| TLC Plate Heater III            | CAMAG          | 981109        |
| Immersion Device III            | CAMAG          | 090301        |
| Mill KB5/10                     | IKA            | 00.183107     |
| Centrifuge EBA21                | Hettich        | 0000799-01-00 |
| Ultrasonic Bath TPC25           | Telsonic       | 2003043       |
| Balance AG245                   | Mettler-Toledo | 1114402254    |

5.1.5 Software

| Software  | Manufacturer | Version     |
|-----------|--------------|-------------|
| WinCATS   | CAMAG        | 1.2.6-1.3.3 |
| VideoScan | CAMAG        | 1.02.00     |

## **5.2 Stability**

### **5.2.1 Stability of analyte in solution and on the plate**

#### **Description of experiment:**

A portion of the BRM is extracted according to section 4.2. 10  $\mu$ L of this solution are applied onto a 10x10 cm plate according to sections 4.4-4.5. The sample and the plate with the applied sample (wrapped in aluminum foil) are set aside. After 3 hours another portion of the same BRM is extracted according to section 4.2. Two times 10  $\mu$ L of this solution are applied according to section 4.5 next to the first sample on the set-aside plate, followed by 10  $\mu$ L of the set-aside sample (see illustration below).

The 4 samples on the plate represent the following: (A) Sample on the plate for 3 hours prior to chromatography, (B) fresh sample applied immediately prior to chromatography (twice), (C) sample prepared 3 hours prior to chromatography (in solution).

The plate is treated according to sections 4.6 to 4.9.

#### **Acceptance criteria:**

The sample is stable for at least 3 hours in solution and 3 hours on the plate prior to chromatography.

#### **Results:**

No difference is seen in any of the chromatograms. The sample is stable on the plate and in solution for at least 3 hours.

#### **Images:**

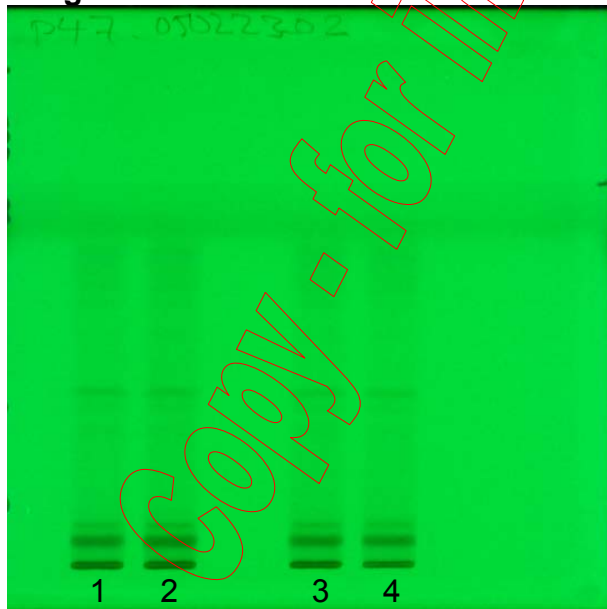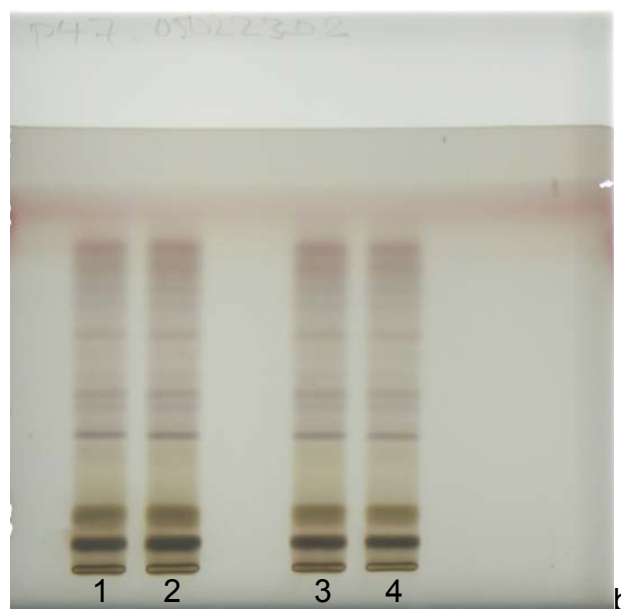

1. Sample on the plate for 3 hours prior to chromatography (A)
2. Fresh sample applied immediately prior to chromatography (B)
3. Sample prepared 3 hours prior to chromatography (in solution) (C)
4. Fresh sample applied immediately prior to chromatography (identical with 2) (B)

**Accepted: YES**

## 5.2.2 Stability of analyte during chromatography

### Description of experiment:

A portion of the BRM is extracted according to section 4.2. 10  $\mu$ L are applied as spot at the lower right corner of a 10x10cm plate (10 mm from each edge). The plate is developed and dried according to section 4.6. The plate is now turned 90° to the right and developed a second time according to section 4.6 with a fresh portion of developing solvent.

The plate is derivatized and documented according to section 4.8 and 4.9.

### Acceptance criteria:

The sample is stable during chromatography if all zones are located on the diagonal connecting the application position with the intersection of the two solvent fronts.

### Results:

No zone is located aside of the diagonal. The sample (Eleuthero root) is stable during chromatography.

### Images:

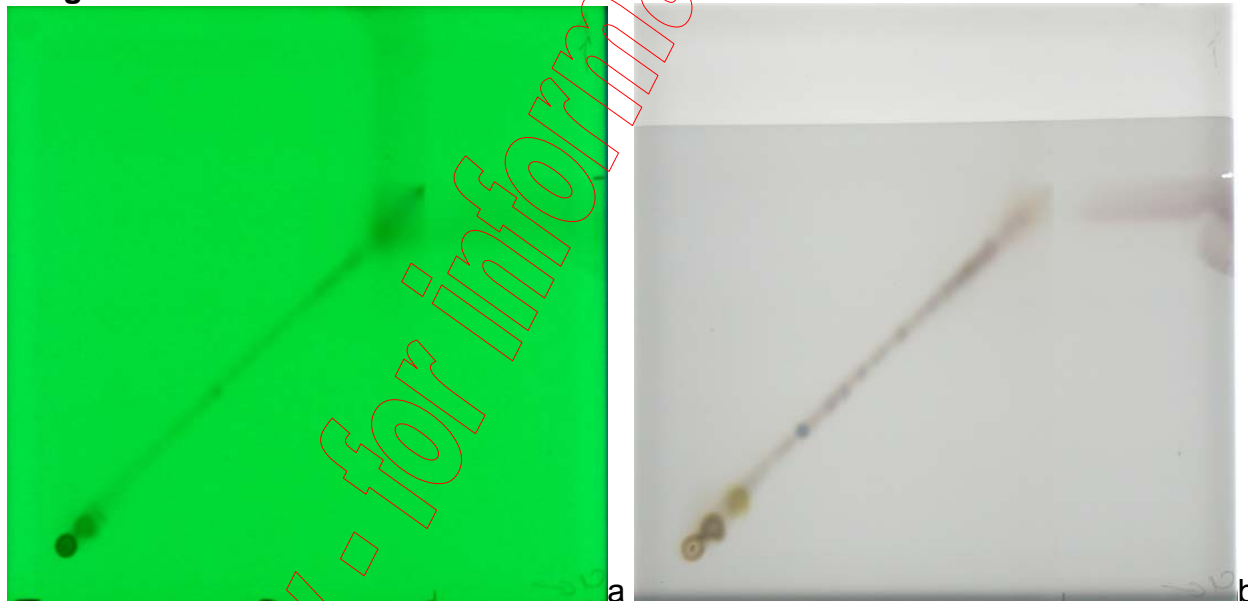

Accepted: YES



### 5.2.3 Stability of derivatization/result

#### Description of experiment:

The botanical reference solution (4.2) is chromatographed according to section 4.3-4.8. After documentation under white light (4.9), the plate is observed for 1 hour. An image is taken after 5, 10, 30 min, and 1h. The images are compared visually and with the help of video-densitometry.

#### Acceptance criteria:

The derivatization yields a stable result, if there is no significant change in the image within 30 min.

#### Results:

The intensity of zones diminishes slightly in the first 5 min, but no zone disappears. No change between 5 min and 1h.

#### Images / Densitograms:

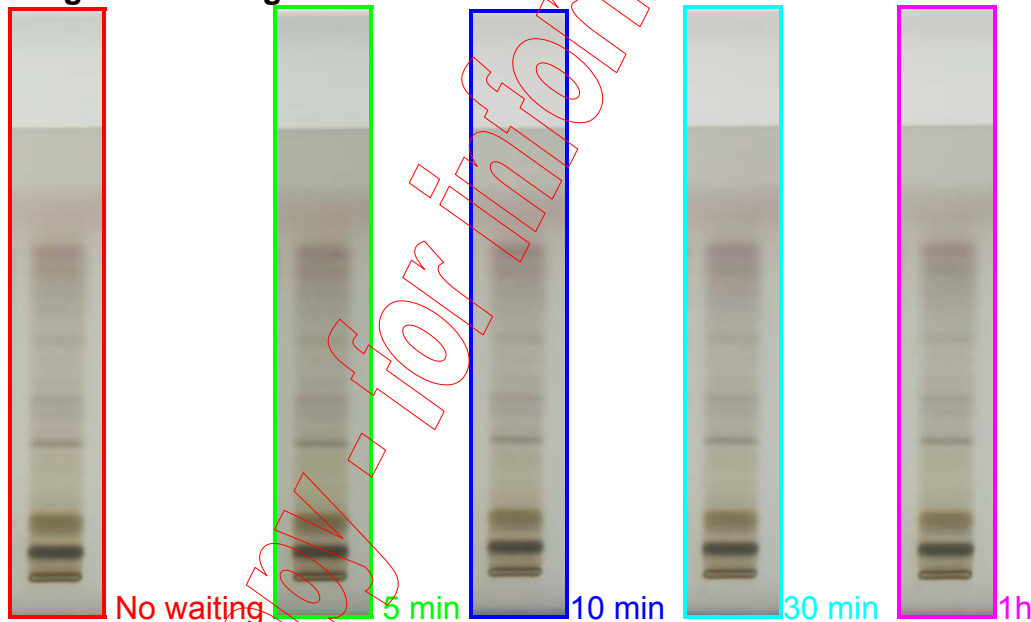

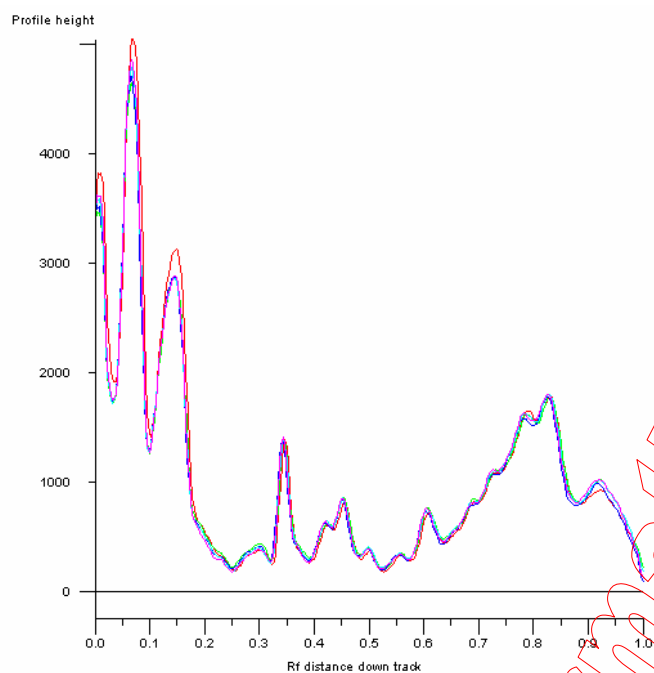

Colors of chromatograms correspond to images above.

**Accepted: YES**

Copy - for information only

## **5.3 Specificity**

### **5.3.1 Identification of Eleuthero root samples by comparison to the Botanical Reference Material (BRM) and chemical references**

#### **Description of experiment:**

Test solutions are prepared according to section 4.1. The BRM of *Eleutherococcus senticosus* and the chemical references are prepared according to section 4.2. All samples are applied onto the same plate according to section 4.5. Following chromatography (section 4.7) and derivatization (section 4.8) the plate is documented (section 4.9) and the results compared to those shown in section 4.10.

#### **Acceptance criteria:**

The method is specific if the fingerprints obtained with the test solutions representing *Eleutherococcus* are similar to that shown in section 4.10 of the method with respect to number, position, color, and intensity of bands matching the chromatogram of the BRM **and** samples of other identity, if present, yield different fingerprints.

#### **Results:**

##### **Image 1**

All raw material samples show a band corresponding to Eleutheroside B under UV 254 nm and bands corresponding to Eleutheroside E, B, and E1 after derivatization. Strong differences in the relative content of eleutherosides and other unknown compounds are seen between all samples. However, the fingerprints of all samples show a similar sequence of bands and can be identified as that of Eleuthero root.

##### **Image 2**

The different root parts show varying amounts of the compounds. The inner root (without bark) shows only very faint bands for the eleutherosides, but strong bands near the application position.

#### **Images:**

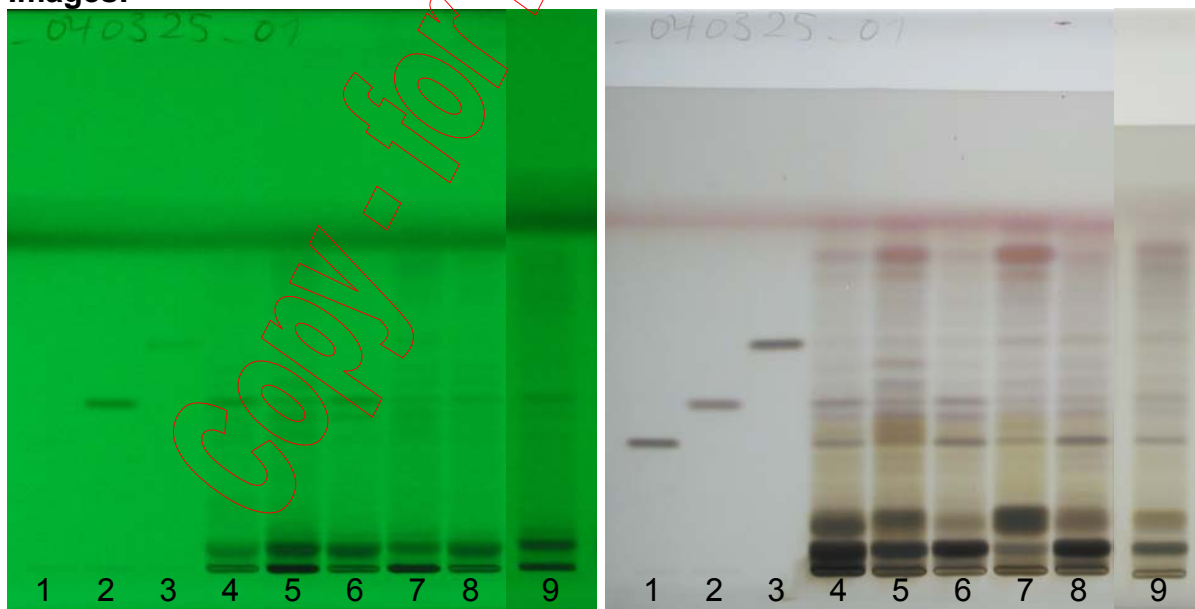

1. Eleutheroside E

2. Eleutheroside B
3. Eleutheroside E1
4. Siberian Ginseng Whole Root
5. Siberian Ginseng Whole Root
6. Siberian Ginseng Whole Root
7. Siberian Ginseng Whole Root
8. Siberian Ginseng Whole Root
9. Eleuthero root (BRM) [Track 4 from Image 4.10]

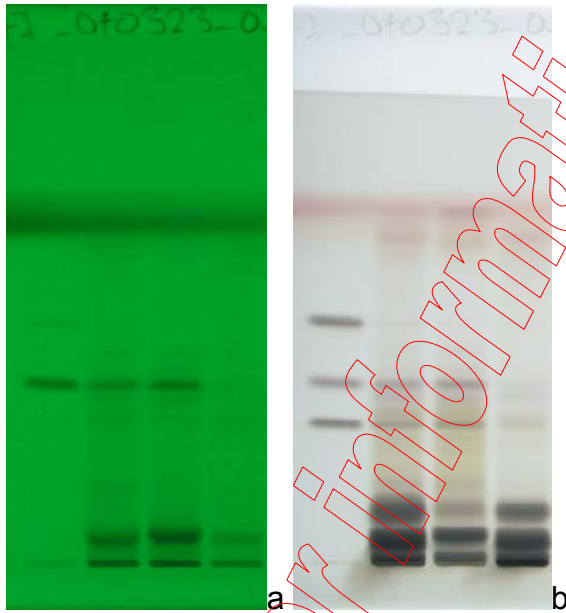

1. Eleutheroside E, B, and E1 (ascending)
  2. Siberian Ginseng Whole Root\*, [same as Track 4 of previous image]
  3. Siberian Ginseng Root Bark only\*
  4. Siberian Ginseng Inner Root only\*
- \* Different parts of the same root

Accepted: **YES**

### 5.3.2 Detection of adulteration

#### Description of experiment:

Authenticated adulterants are prepared according to section 4.1. The BRM of *Eleutherococcus senticosus* and chemical references are prepared according to section 4.2. All samples are applied onto the same plate according to section 4.5. Following chromatography (section 4.7) and derivatization (section 4.8) the plate is documented (section 4.9) and the results compared to those shown in section 4.10.

#### Acceptance criteria:

The method is specific for *Eleutherococcus senticosus* if the fingerprints of the adulterants are significantly different from those of the BRM with respect to number, position, color, and intensity of bands.

#### Results:

UV 254 nm: The adulterants on Lanes 5 and 6 show a strong band at  $R_f=0.3$ .

White light: The adulterants on Lanes 5 and 6 show a black band at  $R_f=0.3$ , a strong bluish band at  $R_f=0.58$ , a red and two brown bands near the front, and bands close to the position\* of the reference substances eleutheroside E (strong), B (faint) E1 (faint).

\*Eleutherosides are not contained in *Periploca*, the bands seen in both samples are due to different compounds migrating to the same position.

#### Images:

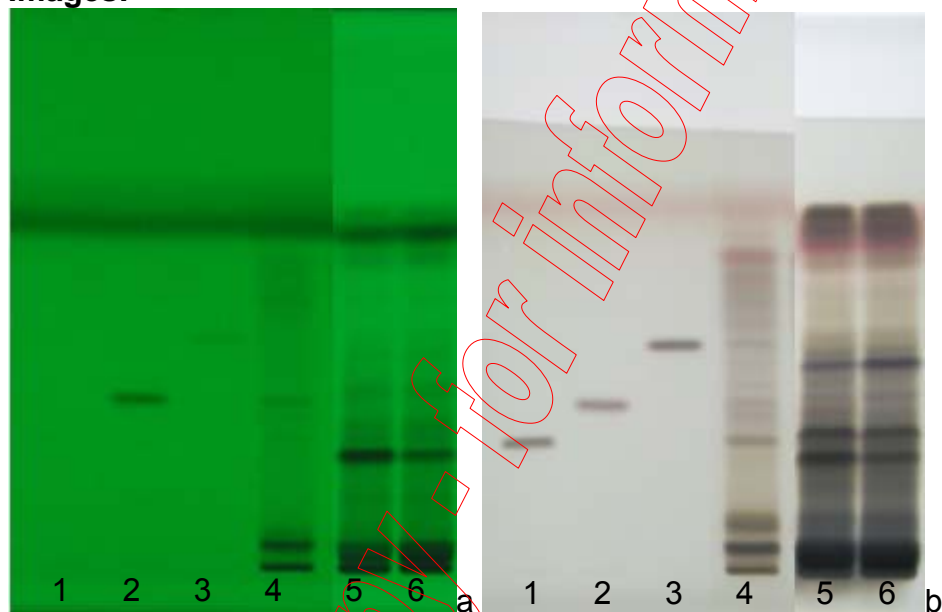

1. Eleutheroside E
2. Eleutheroside B
3. Eleutheroside E1
4. Eleuthero root
5. *Periploca sepium*
6. *Periploca sepium*

Accepted: YES

### 5.3.3 Identification of processed materials and finished products

#### Description of experiment:

Samples of extracts and/or finished products are prepared according to section 4.1. The BRM of *Eleutherococcus* and chemical references are prepared according to section 4.2. All samples are applied onto the same plate according to section 4.5. Following chromatography (section 4.7) and derivatization (section 4.8) the plate is documented (section 4.9) and the results compared to those shown in section 4.10.

#### Acceptance criteria:

The method is suitable for the identification of processed materials of *Eleutherococcus senticosus* if the fingerprints of the samples are similar to that shown in section 4.10 of the method with respect to number, position, color, and intensity of bands matching the profile of the BRM.

#### Results:

UV 254 nm: All samples show a dark band corresponding to eleutheroside B. The tincture on track 8 shows an additional strong band at  $R_f=0.7$ . The tincture on track 11 shows several dark bands over the entire  $R_f$  range, but none near the application position. The sample containing glycerin (track 15) is not suitable for use in this test and was not derivatized.

White light: All samples (except sample on track 11) show bands corresponding to the three eleutherosides, and one or two very strong bands near the application. The Licorice contained in the combination product on track 5 doesn't affect the detection of Eleuthero, but there is a yellow band co-eluting with Eleutheroside B. The tincture on track 11 shows only faint bands corresponding to eleutheroside B and E1. Additional yellow and purple zones are seen in this product (probably due to a combination with other plant materials). The band seen close to the position of eleutheroside E is of a different color. This product can not be identified clearly as Eleuthero. Sample on track 10 shows an unknown strong band at  $R_f=0.4$ . Most of the extracted materials show a more distinct chromatogram than the raw roots.

#### Images:

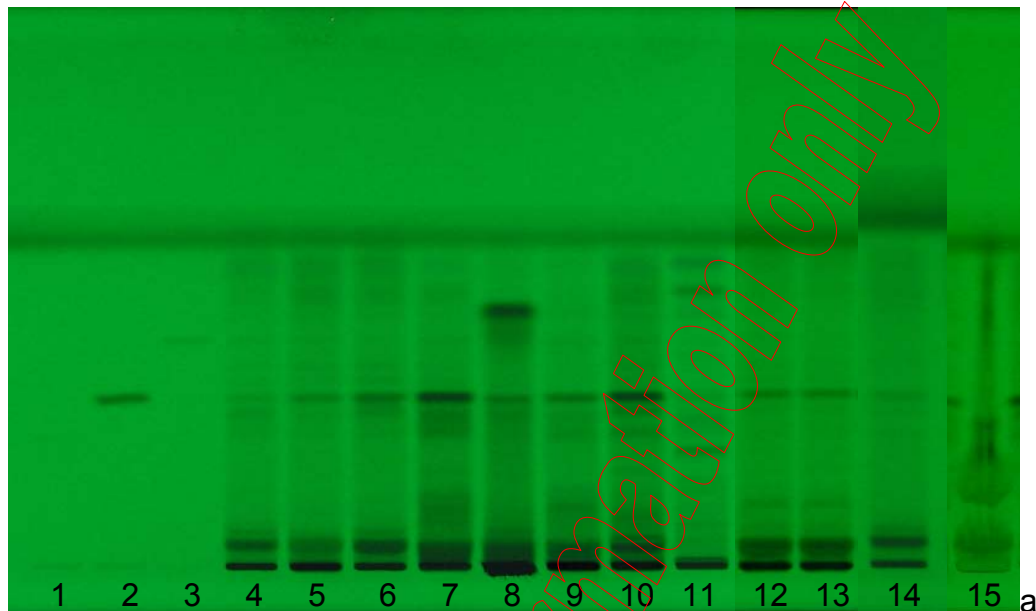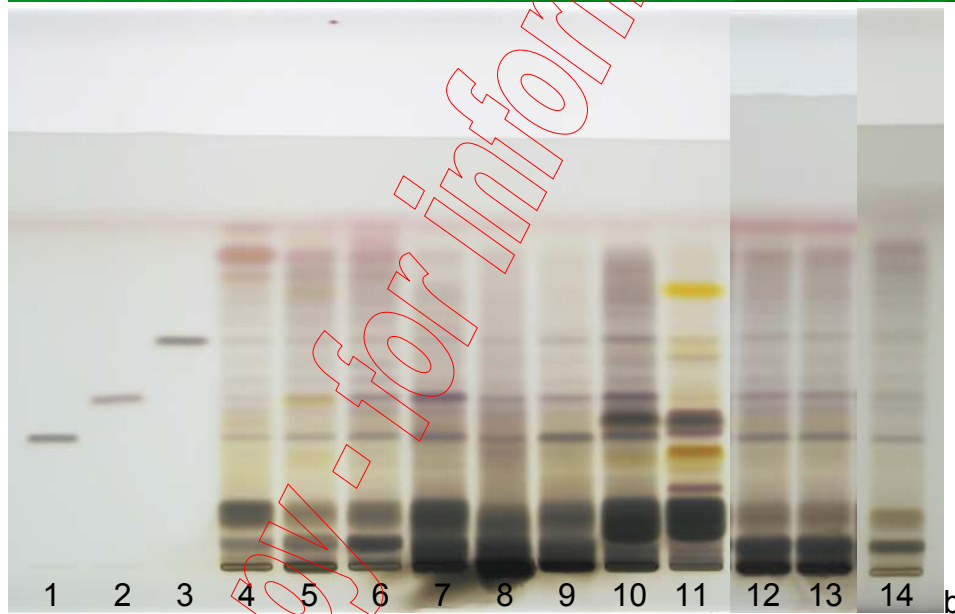

1. Eleutheroside E
2. Eleutheroside B
3. Eleutheroside E1
4. Siberian Ginseng Whole Root
5. Tablet (+ Licorice)
6. Tea bag
7. Capsule with dry extract
8. Tincture
9. Tincture
10. Tincture
11. Tincture
12. USP Standard Extract
13. USP Standard Extract

- 14. Eleuthero root (BRM) [Track 4 from Image 4.10]
- 15. Tincture, vegetable glycerin (only image a)

**Accepted: YES**

**Products on tracks 4-10 and 12-13 pass the test, samples on tracks 11 and 15 fail, track 14 is the BRM.**

*Copy - for information only*



## **5.4 Repeatability**

### **Description of experiment:**

Three portions of the BRM are individually prepared according to section 4.2. Onto three 20x10 cm plates, three aliquots of 10  $\mu$ L of each reference solution are applied according to section 4.5. The plates are chromatographed (section 4.7) subsequently using the same chamber but fresh portions of the developing solvent and fresh filter paper. The plates are derivatized and documented according to 4.8-4.9.

The results across each plate and from plate to plate are evaluated. The average Rf values of the three eleutherosides are determined for each track on each plate.

### **Acceptance criteria:**

The repeatability of the method is acceptable if:

All fingerprints on each plate are identical with respect to number, position, color, and intensity. Across each plate the zones – due to the same compounds – form parallel lines with no disturbance (waves or curves) **and**

The Rf values for each of the three zones on the three plates don't vary more than 0.02.

### **Results:**

All chromatograms look very similar with respect to number, position, color, and intensity of zones. No disturbances are seen.

| Rf               | P47_050223_03 | P47_050223_04 | P47_050223_05 | $\Delta$ Rf |
|------------------|---------------|---------------|---------------|-------------|
| Eleutheroside E  | 0.34          | 0.36          | 0.36          | 0.02        |
| Eleutheroside B  | 0.45          | 0.47          | 0.47          | 0.02        |
| Eleutheroside E1 | 0.61          | 0.63          | 0.63          | 0.02        |

### **Images (only detection b):**

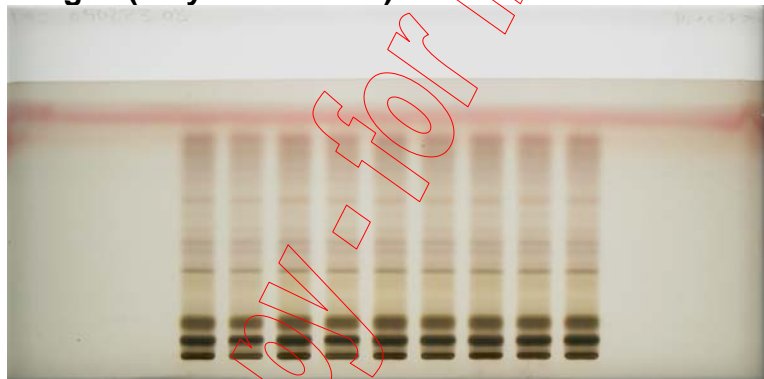

P47\_050223\_03

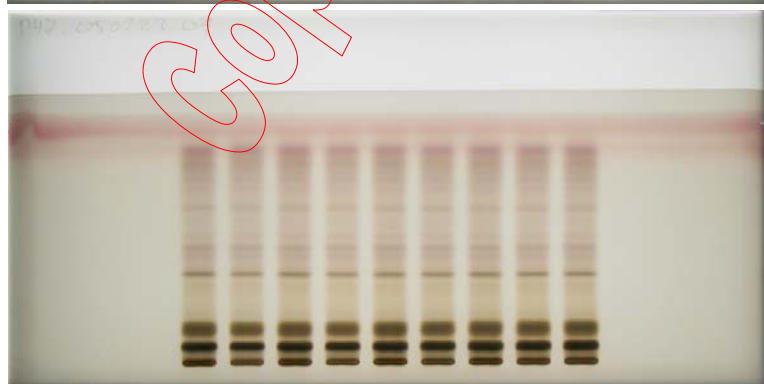

P47\_050223\_04

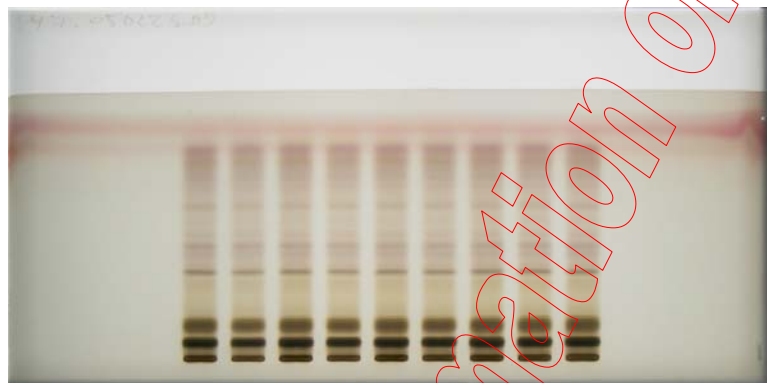

P47\_050223\_05

**Accepted: YES**

### **5.5 Intermediate precision**

#### **Description of experiment:**

Repeat the experiment described under 5.4 on 2 other days, with the following modifications. Only one portion of the BRM is prepared according to section 4.2. Onto one 10x10 cm plate, three aliquots of 10  $\mu$ L of the solution are applied.

The Rf values of the three eleutherosides are determined for each track on each plate (one plate prepared during experiment 5.4, 2 plates on different days) and variations of average Rf values from plate to plate are evaluated.

#### **Acceptance criteria:**

The intermediate precision of the method is acceptable if:

All fingerprints on each plate are identical with respect to number, position, color, and intensity. Across each plate the zones – due to the same compounds – form parallel lines with no disturbance (waves or curves) **and**

The average Rf values for each of the three zones on the three plates don't vary more than 0.05.

#### **Results:**

All chromatograms look very similar with respect to number, position, color, and intensity of zones. No disturbances are seen.

| Rf               | P47_050223_03<br>(Comparison) | P47_050224_01 | P47_050225_01 | $\Delta$ Rf |
|------------------|-------------------------------|---------------|---------------|-------------|
| Eleutheroside E  | 0.34                          | 0.33          | 0.34          | 0.01        |
| Eleutheroside B  | 0.45                          | 0.43          | 0.45          | 0.02        |
| Eleutheroside E1 | 0.61                          | 0.59          | 0.60          | 0.02        |

**Images (only detection b):**

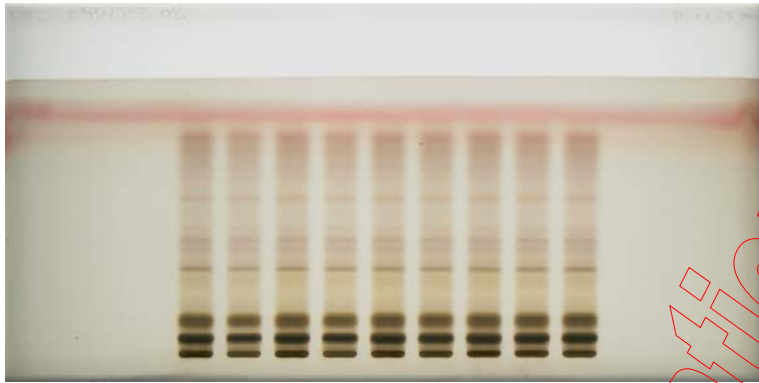

P47\_050223\_03 (Comparison)

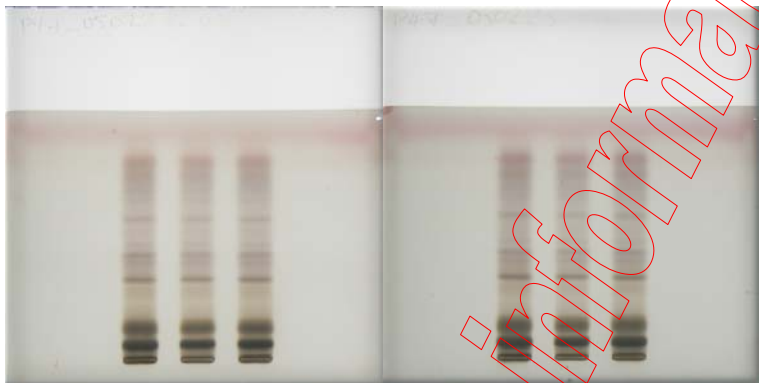

P47\_050224\_01

P47\_050225\_01

**Accepted: YES**

Copy - for information only

## **5.6 Reproducibility**

### **Description of experiment:**

The confirmatory lab repeats the experiment described under 5.4 (Repeatability).

### **Acceptance criteria:**

The reproducibility of the method is acceptable if:

All fingerprints on each plate are identical with respect to number, position, color, and intensity. Across each plate the zones – due to the same compounds – form parallel lines with no disturbance (waves or curves) **and** the average Rf values for each of the three zones on the three plates don't vary more than 0.02.

The reproducibility is acceptable if the Rf obtained in this test are not significantly different from those in obtained in section 5.4 ( $<0.05$  if using plate from the same manufacturer,  $<0.07$  for plates of different manufacturers).

### **Results:**

All chromatograms developed by the confirmatory lab look very similar with respect to number, position, color, and intensity of zones. No disturbances are seen. The color/brightness of the image differs slightly from the image made in the primary lab. This could be due to different documentation devices and settings.

| Rf               | A154-20050309-001 | A154-20050309-002 | A154-20050309-003 | $\Delta Rf$ | P47_050223_03<br>(Comparison) | $\Delta Rf$ |
|------------------|-------------------|-------------------|-------------------|-------------|-------------------------------|-------------|
| Eleutheroside E  | 0.34              | 0.33              | 0.35              | 0.02        | 0.34                          | 0.01        |
| Eleutheroside B  | 0.45              | 0.45              | 0.46              | 0.01        | 0.45                          | 0.01        |
| Eleutheroside E1 | 0.61              | 0.61              | 0.62              | 0.01        | 0.61                          | 0.01        |

### **Images (only detection b):**

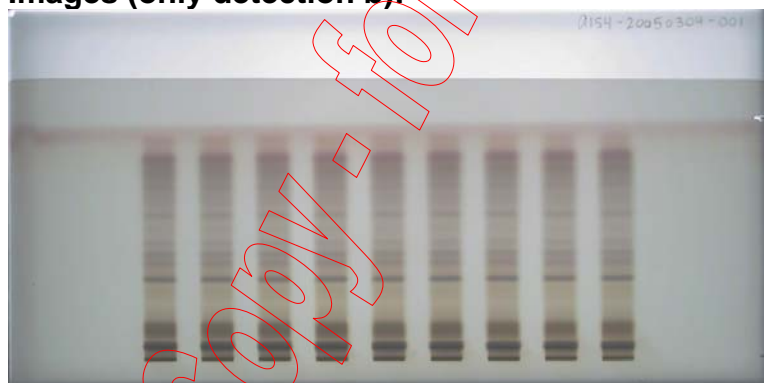

A154-20050309-001

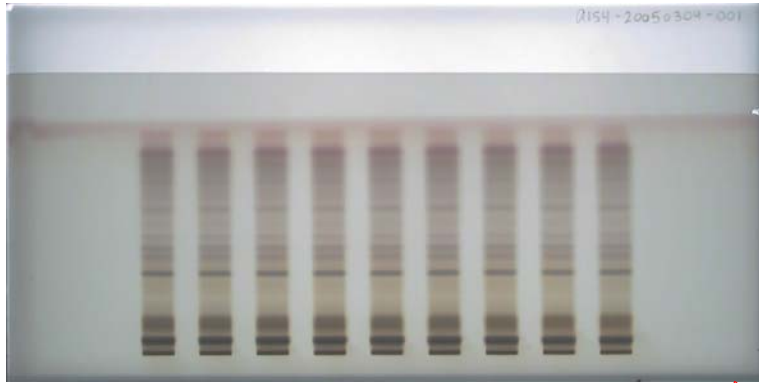

A154-20050309-002

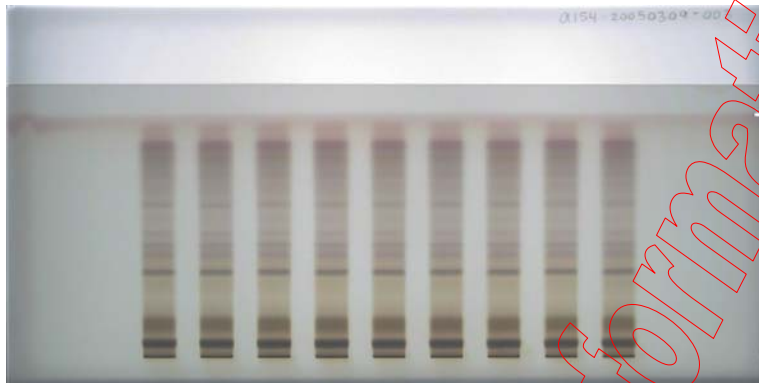

A154-20050309-003

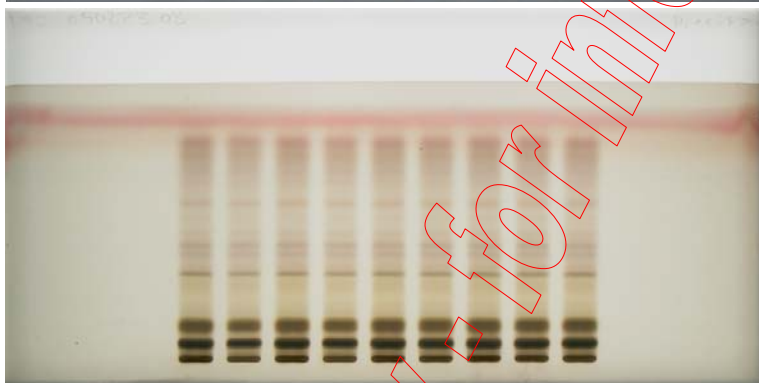

P47\_050223\_03 (Comparison)

**Accepted: YES**

Copy - for information only

## **5.7. Robustness**

### **5.7.1 Chamber type**

#### **Description of experiment:**

The method is executed according to section 4 using the BRM. Instead of a Twin Trough Chamber a Flat Bottom Chamber of comparable size is used.

#### **Acceptance criteria:**

The fingerprints obtained in both chambers are similar with respect to number, position, color, and intensity of zones. The Rf values obtained in this test are not significantly different from those described in section 4.10 ( $<0.05$ ). In the case of differences between the results the use of a Flat Bottom Chamber must be excluded.

#### **Results:**

No significant difference is seen when the plate is developed in a Flat Bottom Chamber. Slightly lower Rf values are observed.

| Rf               | Image 4.10 | P47_050225_02 | $\Delta Rf$ |
|------------------|------------|---------------|-------------|
| Eleutheroside E  | 0.34       | 0.33          | 0.01        |
| Eleutheroside B  | 0.45       | 0.43          | 0.02        |
| Eleutheroside E1 | 0.60       | 0.58          | 0.02        |

#### **Images (only detection b):**

Twin Trough Chamber      Flat Bottom Chamber  
(Image of section 4.10)

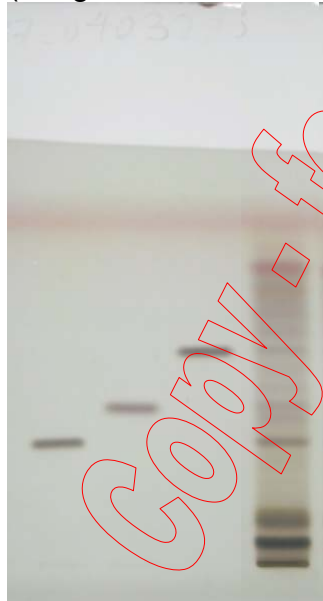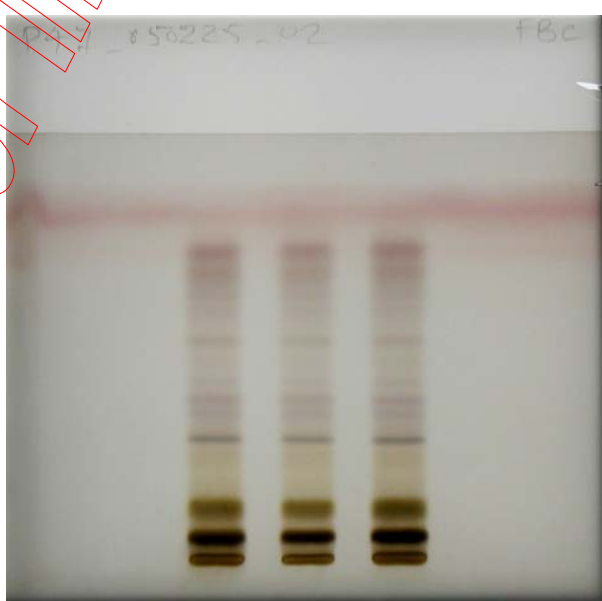

**Accepted: YES**

## 5.7.2 Developing distance

### Description of experiment:

The method is executed according to section 4 using only the BRM.  
The developing distance is increased to 75 mm from the lower edge of plate.

### Acceptance criteria:

The fingerprints obtained with different developing distances are similar with respect to number, position, color, and intensity of zones. The Rf values obtained in this test are not significantly different from those described in section 4.10 (<0.05). In the case of differences between the results the developing distance of more than 70 mm yields invalid results.

### Results:

The separation is not affected by the increased developing distance. Slightly lower Rf values are observed.

| Rf               | Image 4.10 | P47_050223_07 | $\Delta Rf$ |
|------------------|------------|---------------|-------------|
| Eleutheroside E  | 0.34       | 0.33          | 0.01        |
| Eleutheroside B  | 0.45       | 0.44          | 0.01        |
| Eleutheroside E1 | 0.60       | 0.58          | 0.02        |

### Images (only detection b):

70 mm

(Image of section 4.10)

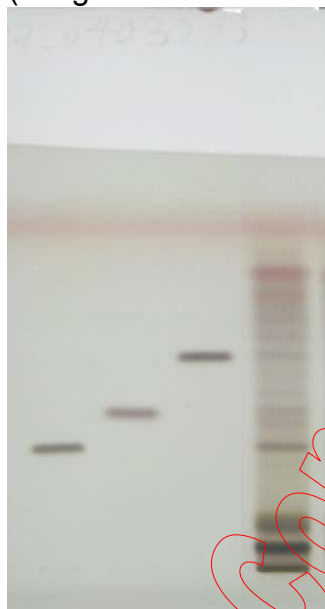

75 mm (developing distances measured from lower edge of plate)

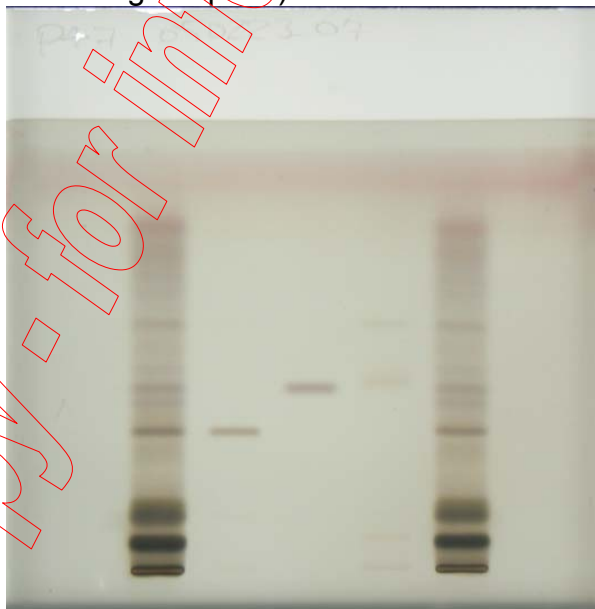

Accepted: YES

### 5.7.3 Waiting times

Because the sample is stable on the plate, in solution, and during chromatography, and the derivatization is not critical, this experiment was not performed in this example. For details see section 5.2.1-5.2.3.

### 5.7.4 Relative humidity

#### Description of experiment:

Six plates are prepared according to section 4 using only one BRM. Prior to chromatography (4.6), the plates are conditioned over salt solutions and/or sulfuric acid for adjusting different relative humidity. Relative humidity covering a range of about 20-60% relative humidity should be tested.

Alternatively, results of plates developed under different relative humidity are compared.

#### Acceptance criteria:

The fingerprints obtained under different relative humidity are similar with respect to number, position, color, and intensity. In this case the relative humidity does not affect the result. In the case of differences of the results, the method may require the control of relative humidity.

#### Results:

Only small variations in R<sub>f</sub> values at low-medium rel. humidity (16-47%). Band broadening and separation difference are seen at high humidity (>58%). The chromatogram should not be developed without humidity control when the surrounding relative humidity exceeds 50%.

| R <sub>f</sub>   | 16%  | 28%  | 37%  | 47%  | 58%   | 75%    |
|------------------|------|------|------|------|-------|--------|
| Eleutheroside E  | 0.33 | 0.34 | 0.34 | 0.33 | 0.36  | 0.44   |
| Eleutheroside B  | 0.43 | 0.45 | 0.45 | 0.43 | 0.43* | 0.57** |
| Eleutheroside E1 | 0.57 | 0.6  | 0.6  | 0.59 | 0.6   | 0.66   |

\*overlap \*\*very faint



**Images (only detection b):**

P47\_050225\_04 (16%)

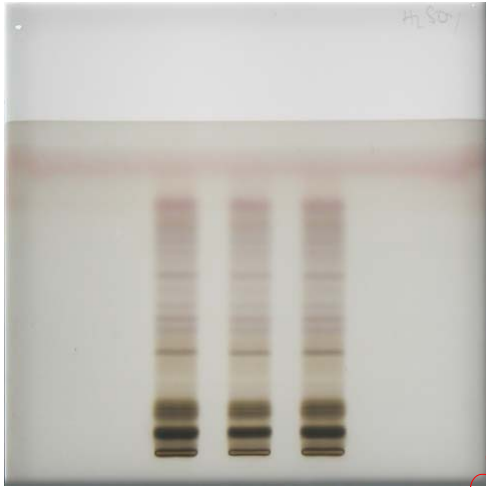

P47\_050225\_01 (28%)

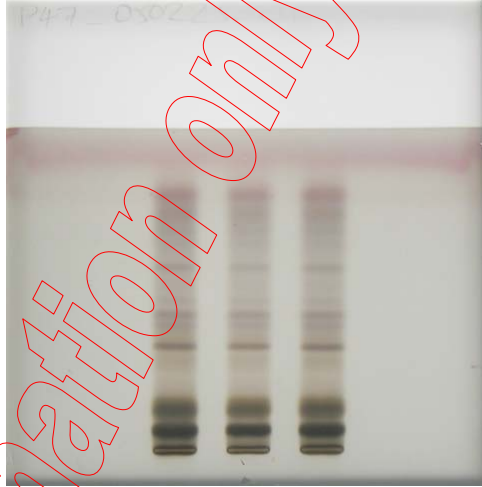

P47\_050422\_02 (37%)

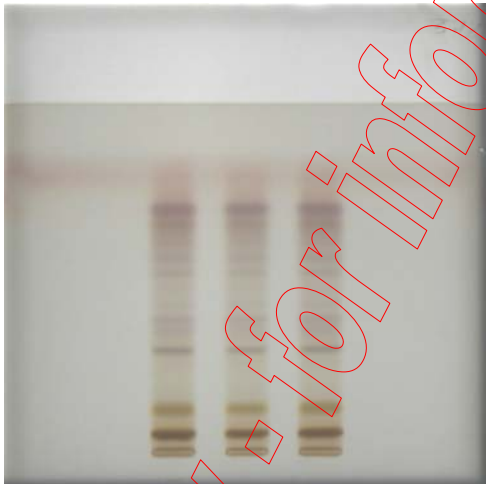

P47\_050422\_03 (47%)

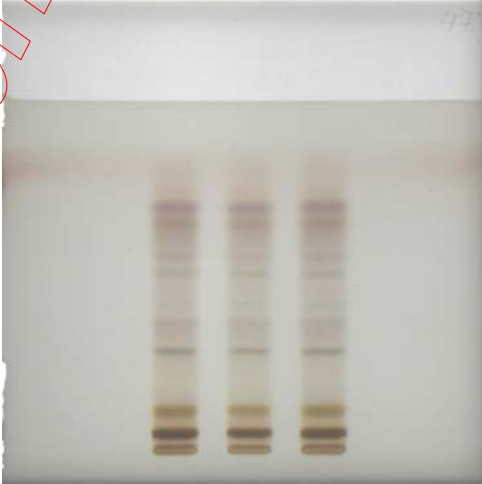

P47\_050225\_05 (58%)

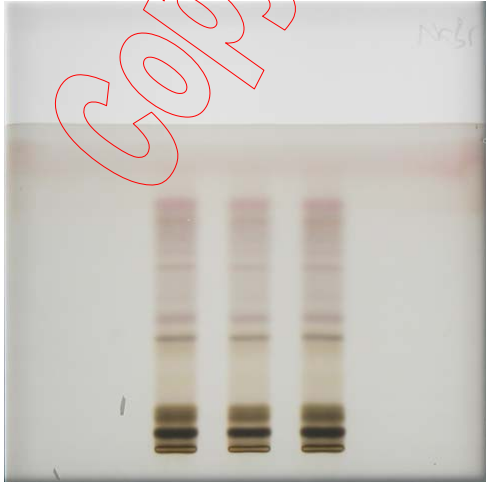

P47\_050225\_06 (75%)

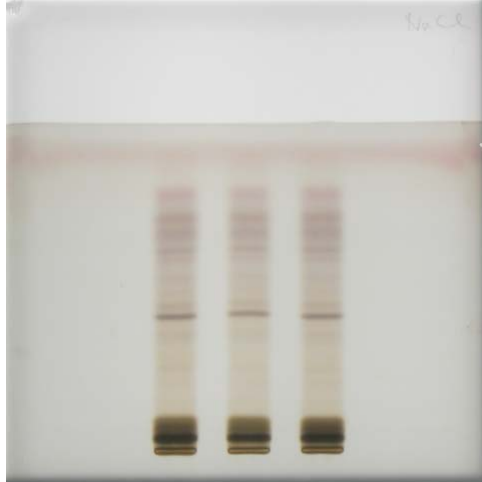

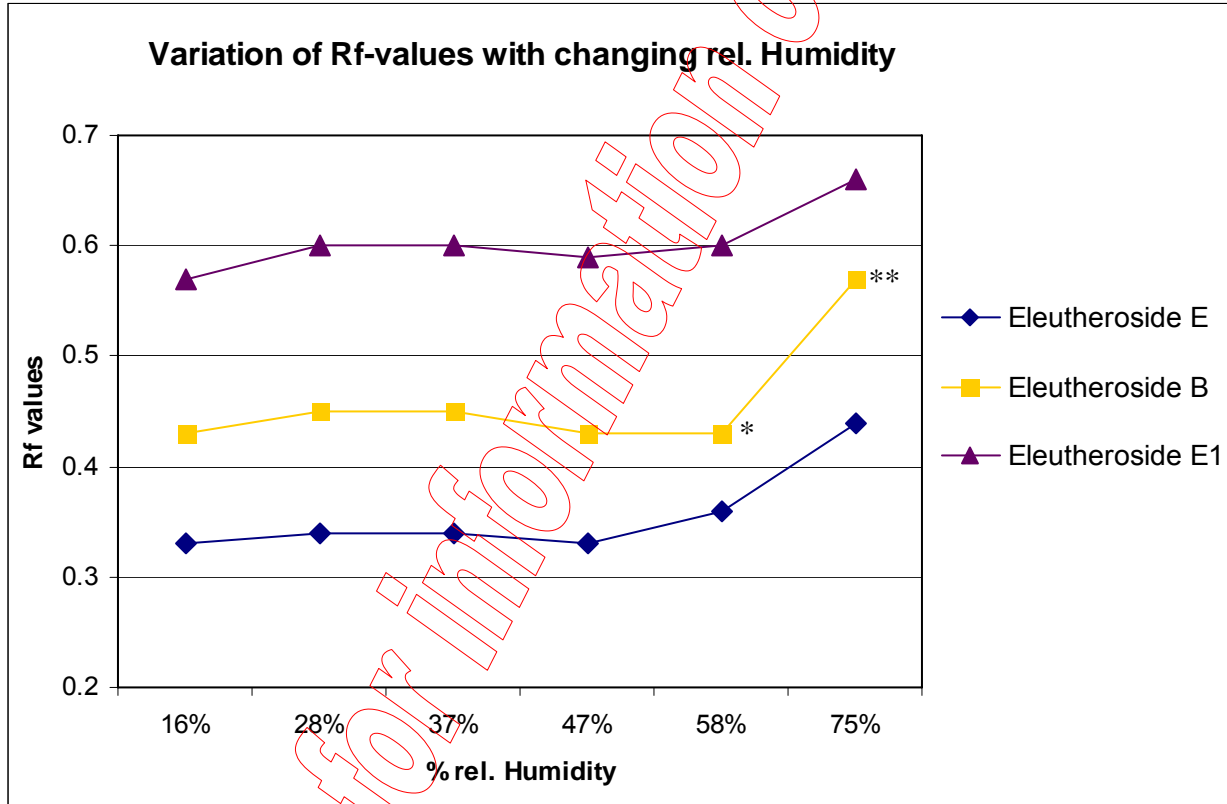

\*overlap \*\*very faint

**6. Conclusions, Approvals, and Signatures**

**6.1 Conclusions of primary lab**

Date:

Analyst of primary lab:

**6.2 Conclusions of substantiating lab**

Date:

Analyst of substantiating lab:

**6.3. Final approval of study director**

Date:

Study director:

Copy - for information only
