# Supplementary material
Source: PubMed Central journal article supplement (PMC2662610)
Supplement: NIHMS87256-supplement-4a.pdf [file NIHMS87256-supplement-4a.pdf]

## **Selection of Method for Identification of Roots of Echinacea species by HPTLC Fingerprint**

The AHP methods for identification of Echinacea species based on alkylamide and phenylpropanoid fingerprints published in the AHP monograph:

Echinacea pupurea Root: ISBN 1-929425, American Herbal Pharmacopoeia, Scotts Valley, CA 95067, 2004

were selected for validation for roots of *Echinaceae purpurea*, *Echinacea angustifolia*, and *Echinacea pallida*.

The same methods and validation data with respect to the requirements stipulated (then) by the AOAC Peer Verified Method Program was published by Reich et al in the Journal of Planar Chromatography<sup>1</sup>.

The same methods have been adopted by the European Pharmacopoeia as part of the monographs on *Echinaceae purpurea radix*, *Echinacea angustifolia radix* and *Echinacea pallida radix*.

The methods had to be adapted to follow a standardized HPTLC procedure: developing distance was increased to 70 mm.

1) Reich, E., Blatter, A., Jorns, R., Kreuter, M., and Tiekötter, K.: [An AOAC Peer-Verified Method for Identification of Echinacea Species by HPTLC](#). J. Planar Chromatogr. 15, 244-251 (2002).
