# Supplementary material
Source: PubMed Central journal article supplement (PMC2662610)
Supplement: NIHMS87256-supplement-6b.pdf [file NIHMS87256-supplement-6b.pdf]

## **Validation of Method for Identification of Licorice by HPTLC Fingerprint**

### **1. Purpose of method to be validated:**

The identification method for Licorice by HPTLC fingerprint is suitable to identify a given sample of plant material as Licorice (*Glycyrrhiza glabra* Linne or *Glycyrrhiza uralensis* Fischer).

The method may be used to identify an extract, or finished product as derived from Licorice (*Glycyrrhiza glabra* Linne or *Glycyrrhiza uralensis* Fischer), provided that the material was made from a single herb and intended to contain the constituent profile seen in Licorice.

### **2. General acceptance criteria:**

The method is valid if:

- A botanically authenticated sample of *Glycyrrhiza glabra* Linne or *Glycyrrhiza uralensis* Fischer yields a fingerprint which is similar to that shown in section 4.10 of the method with respect to number, position, color, and intensity of bands **and**
- All acceptance criteria specified in sections 5.2 to 5.6 are met **and**
- Any deviation from the expected result doesn't exceed those deviations seen under section 5.7 (Robustness).

### **3. Personnel**

#### **3.1 Study director**

Name: Kerri LeVanseler  
Company: Institute for Nutraceutical Advancement  
Address: 789 Dixboro Road  
City: Ann Arbor, Michigan 48105  
Phone: 734 827 6815  
Fax: 734 827 6832  
E-mail: levanseler@nsf.org

#### **3.2 Reviewer**

Name: Eike Reich  
Company: CAMAG  
Address: Sonnenmattstrasse 11  
City: Muttenz, CH 4132  
Phone: (41) 61 467 3434  
Fax: (41) 61 461 0702  
E-mail: eike.reich@camag.com

#### **3.3 Analyst of primary lab**

Name: Anne Schibli  
Company: CAMAG  
Address: Sonnenmattstrasse 11  
City: Muttenz, CH 4132  
Phone: (41) 61 467 3434  
Fax: (41) 61 461 0702  
E-mail: anne.schibli@camag.com

#### **3.4 Analyst of confirmatory lab**

Name: Alison DeBatt  
Company: CAMAG Scientific Inc.  
Address: 515 Cornelius Harnett Drive  
City: Wilmington NC 28401  
Phone: 910 343 1830  
Fax: 910 343 1834  
E-mail: tlc@camagusa.com

#### **4. Description of method to be validated**

##### **4.1 Preparation of test solutions**

0.5 g of milled root (or enough product equivalent to that amount) are sonicated for 10 min with 10 mL ethanol-water 70:30. The solution is centrifuged and the supernatant is used as test solution.

##### **4.2 Preparation of reference solutions**

Botanical reference solution: 0.5 g of botanically authenticated and milled root (BRM, botanical reference material) are sonicated for 10 min with 10 mL ethanol-water 70:30. The solution is centrifuged and the supernatant is used as reference solution.

Chemical reference solution: 1 mg ammonium glycyrrhizate is dissolved in 10 mL ethanol-water 70:30.

##### **4.3 Preparation of derivatizing reagent**

Sulfuric acid reagent: 20 mL sulfuric acid are carefully added to 180 ml ice-cold methanol.

##### **4.4 Stationary phase**

10x10 cm (or 20x10 cm) glass plates HPTLC silica gel 60 F<sub>254</sub> (Merck).

##### **4.5 Sample application**

2 µL of test solution, 2 µL of reference solution, and 10 µL of standard are applied each as 8 mm bands, at least 2 mm apart, 8 mm from the lower edge and at least 15 mm from left and right edges of the plate.

##### **4.6 Temperature and Humidity**

Record temperature and humidity in the laboratory.

##### **4.7 Chromatography**

|                      |                                                                                                                     |
|----------------------|---------------------------------------------------------------------------------------------------------------------|
| Chamber type:        | 10x10 cm (or 20x10 cm) Twin Trough Chamber                                                                          |
| Configuration:       | Saturated for 20 min (wetted filter paper in trough opposite to the plate)                                          |
| Developing solvent:  | Ethyl acetate, formic acid, acetic acid, water (15:1:1:2); 5 mL (respectively 10 mL) developing solvent per trough. |
| Developing distance: | 70 mm from lower edge of plate (62 mm from application position)                                                    |
| Drying:              | 5 min with cold air (hair dryer)                                                                                    |

##### **4.8 Derivatization**

The plate is immersed into reagent for 1 s, then heated at 100°C for 10 min.

##### **4.9 Documentation**

a) Prior to derivatization under UV 254 nm (not shown in all examples)

b) After derivatization under white light

#### 4.10 Images of chromatograms

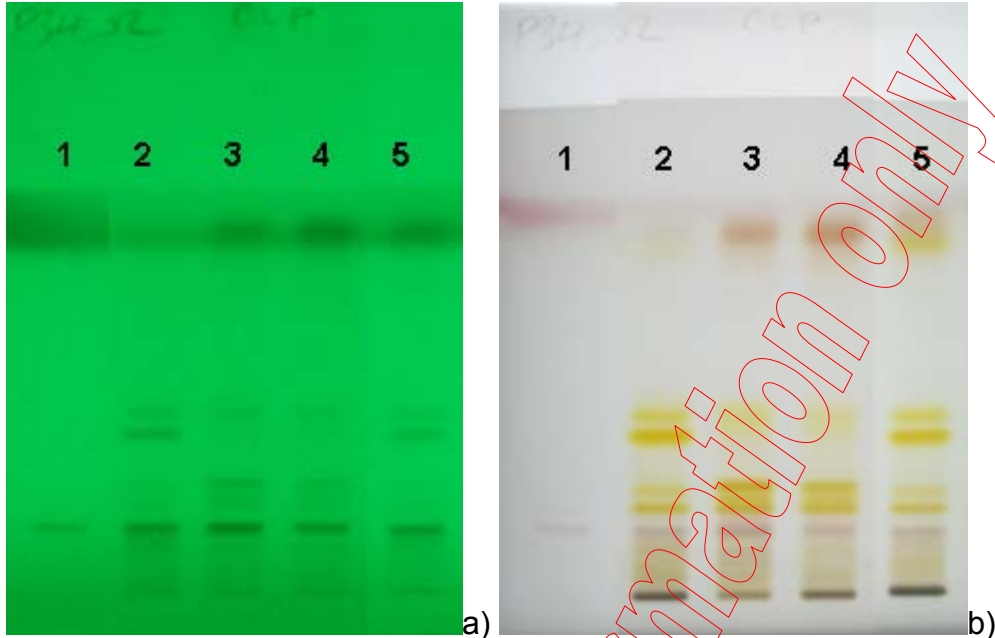

- 1: Ammonium glycyrrhizate
- 2: Licorice root, milled (*Glycyrrhiza glabra*)
- 3: *Glycyrrhiza glabra* AUZ
- 4: *Glycyrrhiza glabra* AUZ
- 5: *Glycyrrhiza uralensis*

All samples included in the images are authenticated botanical reference materials (BRM).

#### 4.11 Evaluation of results:

##### UV 254 nm

The chromatogram of the standard (track 1) shows a quenching zone around  $R_f=0.2$ . All BRMs show a quenching zone at the same position. Four additional quenching zones are seen at middle  $R_f$  in the BRMs. The pattern of BRMs on tracks 2 and 5 are similar and so are those on tracks 3 and 4.

##### White light

The chromatogram of the standard (track 1) shows a violet zone around  $R_f=0.2$ . All BRMs show a violet zone at the same position. Four yellow zones are seen at middle  $R_f$  in the BRMs. The intensity of the yellow zones at middle  $R_f$  varies in the samples. Additional zones are seen near the front and between application position and ammonium glycyrrhizate. The pattern of BRMs on tracks 2 and 5 are similar and so are those on tracks 3 and 4.

*G. glabra* and *G. uralensis* don't show any significant difference in their fingerprints. Two types of samples are seen, which differ in the intensity of the zones in the middle of the  $R_f$  region and the presence of zones near the front.

**4.12 System suitability test:**

The result obtained in the test is suitable for evaluation if the following requirement is met. After derivatization the fingerprint of the test solution shows a zone corresponding to eleutheroside B and another zone directly below. These two zones appear as two distinct bands, see arrows in Fig. 4.10

Copy - for information only

## **5. Validation**

### **5.1 Materials**

#### **5.1.1 Chemicals and solvents**

| <b>Name</b>             | <b>Manufacturer</b> | <b>Quality</b> |
|-------------------------|---------------------|----------------|
| Ethanol                 | Merck               | p.a            |
| Methanol                | Merck               | p.a            |
| Ethyl acetate           | Merck               | p.a            |
| Glacial acetic acid 99% | Merck               | p.a            |
| Formic acid 98-100%     | Merck               | p.a            |
| Sulfuric acid 98%       | Merck               | p.a            |
| Water                   | In house            | --             |

#### **5.1.2 Samples and Reference materials**

##### Botanical reference material

| <b>Sample Name</b>                                     | <b>Source / Lot</b>                  | <b>Authentication</b> |
|--------------------------------------------------------|--------------------------------------|-----------------------|
| Licorice root, milled<br>( <i>Glycyrrhiza glabra</i> ) | Removed - proprietary<br>information | Yes                   |
| <i>Glycyrrhiza glabra</i> AUIZ                         |                                      | Yes                   |
| <i>Glycyrrhiza glabra</i> AUIZ                         |                                      | Yes                   |
| <i>Glycyrrhiza uralensis</i>                           |                                      | Yes                   |

##### Additional samples

| <b>Name</b>                                 | <b>Source</b>                        | <b>Authentication</b> |
|---------------------------------------------|--------------------------------------|-----------------------|
| <i>Glycyrrhiza uralensis</i> Fisch.         | Removed - proprietary<br>information | No                    |
| <i>Glycyrrhiza glabra</i>                   |                                      | No                    |
| Commercial Licorice Slices 2<br>mm x 3-4 cm |                                      | No                    |

##### Processed materials

| <b>Name</b>                                                 | <b>Source</b>                        | <b>Authentication</b> |
|-------------------------------------------------------------|--------------------------------------|-----------------------|
| Licorice root capsules, 450<br>mg                           | Removed - proprietary<br>information | No                    |
| DGL De-glycyrrhinated<br>Licorice extract Lozenge 400<br>mg |                                      | No                    |
| Licorice + herbal blended<br>extract (liquid)               |                                      | No                    |

##### Standards (marker compounds, chemical references)

| <b>Name</b>                                    | <b>Source</b>  |
|------------------------------------------------|----------------|
| Ammonium glycyrrhizate<br>(=glycyrrhizic acid) | Roth, 23236047 |

### 5.1.3 Plates

| TLC plate                     | Size     | Source | Batch                |
|-------------------------------|----------|--------|----------------------|
| Glass plates HPTLC Si 60 F254 | 10x10 cm | Merck  | OB 291342, OB 302430 |
| Glass plates HPTLC Si 60 F254 | 20x10 cm | Merck  | OB 464935, OB 345031 |

### 5.1.4 Instruments

| Instrument                      | Manufacturer   | Serial Number |
|---------------------------------|----------------|---------------|
| Automatic TLC Sampler 4         | CAMAG          | 061104        |
| DigiStore using Canon G5 camera | CAMAG          | 070705        |
| TTC 20x10 cm                    | CAMAG          | n. a.         |
| TTC 10x10 cm                    | CAMAG          | n. a.         |
| TLC Plate Heater III            | CAMAG          | 981109        |
| Immersion Device III            | CAMAG          | 090301        |
| Mill KB5/10                     | IKA            | 00.183107     |
| Centrifuge EBA21                | Hettich        | 0000799-01-00 |
| Ultrasonic Bath TPC25           | Telsonic       | 2003043       |
| Balance AG245                   | Mettler-Toledo | 1114402254    |

### 5.1.5 Software

| Software  | Manufacturer | Version     |
|-----------|--------------|-------------|
| WinCATS   | CAMAG        | 1.2.6-1.3.3 |
| VideoScan | CAMAG        | 1.02.00     |

## **5.2 Stability**

### **5.2.1 Stability of analyte in solution and on the plate**

#### **Description of experiment:**

A portion of the BRM is extracted according to section 4.2. 10  $\mu$ L of this solution are applied onto a 10x10 cm plate according to sections 4.4-4.5. The sample and the plate with the applied sample (wrapped in aluminum foil) are set aside. After 3 hours another portion of the same BRM is extracted according to section 4.2. Two times 10  $\mu$ L of this solution are applied according to section 4.5 next to the first sample on the set-aside plate, followed by 10  $\mu$ L of the set-aside sample (see illustration below).

The 4 samples on the plate represent the following: (A) Sample on the plate for 3 hours prior to chromatography, (B) fresh sample applied immediately prior to chromatography (twice), (C) sample prepared 3 hours prior to chromatography (in solution).

The plate is treated according to sections 4.6 to 4.9.

#### **Acceptance criteria:**

The sample is stable for at least 3 hours in solution and 3 hours on the plate prior to chromatography.

#### **Results:**

No difference is seen in any of the chromatograms. The sample is stable on the plate and in solution for at least 3 hours.

#### **Image(s):**

White light after derivatization

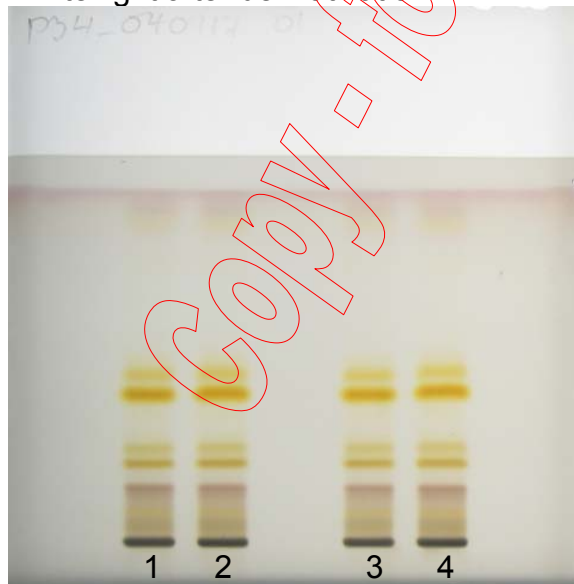

G. glabra

1. Sample on the plate for 3 hours prior to chromatography (A)
2. Fresh sample applied immediately prior to chromatography (B)
3. Sample prepared 3 hours prior to chromatography (in solution) (C)
4. Fresh sample applied immediately prior to chromatography (identical with 2) (B)

**Accepted: YES**



## 5.2.2 Stability of analyte during chromatography

### Description of experiment:

A portion of the BRM is extracted according to section 4.2. 10  $\mu$ L are applied as spot at the lower right corner of a 10x10cm plate (10 mm from each edge). The plate is developed and dried according to section 4.6. The plate is now turned 90° to the right and developed a second time according to section 4.6 with a fresh portion of developing solvent.

The plate is derivatized and documented according to section 4.8 and 4.9.

### Acceptance criteria:

The sample is stable during chromatography if all zones are located on the diagonal connecting the application position with the intersection of the two solvent fronts.

### Results:

No zone is located aside of the diagonal. The sample (Licorice root, milled *Glycyrrhiza glabra*) is stable during chromatography. The arrows in the images mark the position of ammonium glycyrrhizate.

### Image(s):

UV 254 nm prior to derivatization

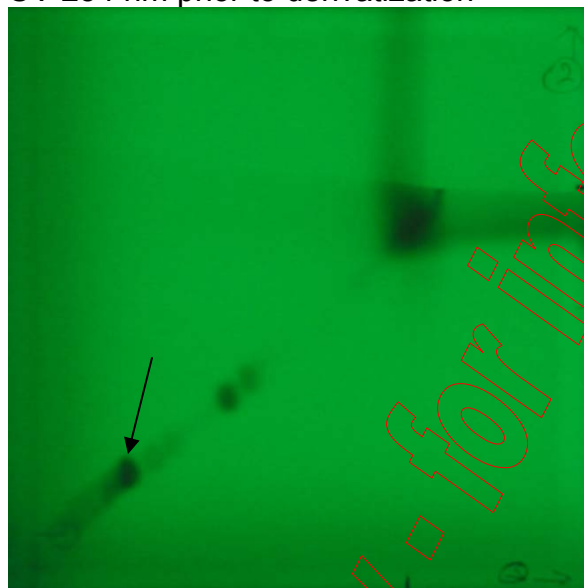

White light after derivatization

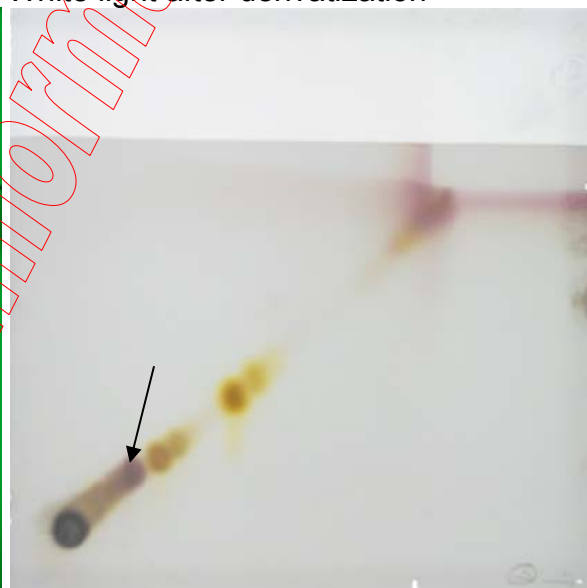

Accepted: YES

### 5.2.3 Stability of derivatization/result

#### Description of experiment:

One botanical reference solution (4.2) is chromatographed according to section 4. After documentation under white light, the plate is observed for 30 more minutes. An image is taken after 2, 5, 10, 15, 20 and 30 min. The images are compared visually and with the help of video-densitometry.

#### Acceptance criteria:

The derivatization yields a stable result, if there is no significant change in the image within 30 min.

#### Results:

The color and intensity of zones changes slightly over time, but no zone disappears. No change between 20 and 30 min.

#### Image(s) / Densitograms:

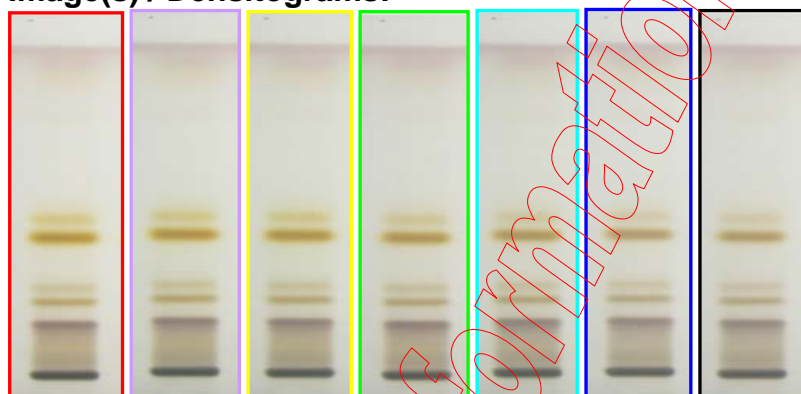

No waiting, 5 min, 5 min, 10 min, 15 min, 20 min, 30 min

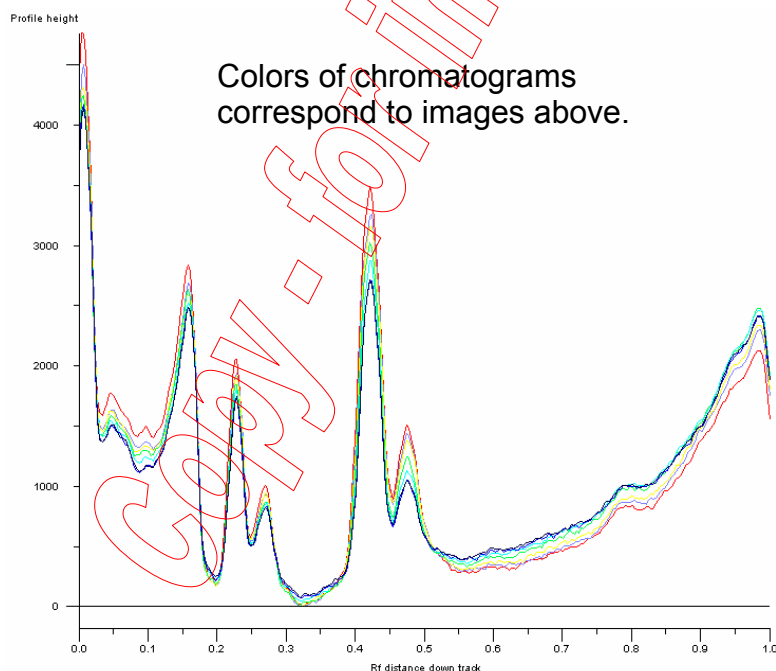

Accepted: YES

### **5.3 Specificity**

#### **5.3.1 Identification of Licorice samples, processed materials and finished products by comparison to Botanical Reference Materials (BRM) and chemical reference**

##### **Description of experiment:**

Test solutions are prepared according to section 4.1. The BRMs of *G. glabra* and *G. uralensis* are prepared according to section 4.2 (botanical reference solutions). All samples are applied onto the same plate according to section 4.5. Following chromatography (sec.4.7) and derivatization (sec.4.8) the plates are documented (sec.4.9) and the results compared to those shown in section 4.10.

##### **Acceptance criteria:**

The method is specific if the fingerprints obtained with the test solutions representing licorice are similar to that shown in section 4.10 of the method with respect to number, position, color, and intensity of bands matching either of the two types of BRMs and samples of other identity yield different fingerprints.

**Note:** In this test the individual samples can either pass or fail, however, authenticated samples must pass.

##### **Results:**

The method is specific. All raw material samples and the capsules meet the acceptance criteria. The DGL-lozenges and the blended liquid extract don't.

##### **Image(s):**

**Image prior to derivatization under UV 254 nm**

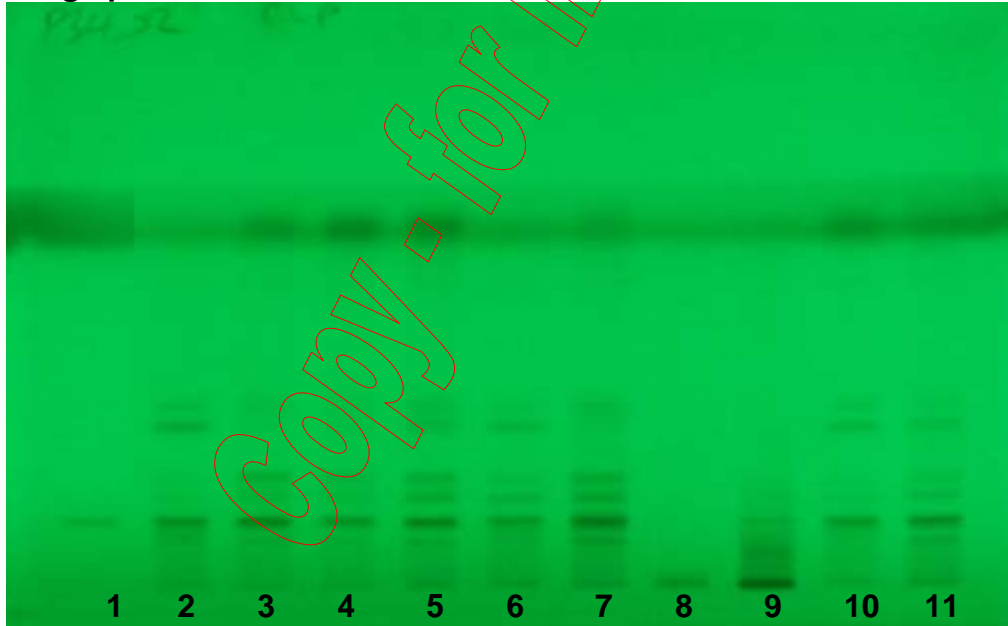

**Image after derivatization under white light**

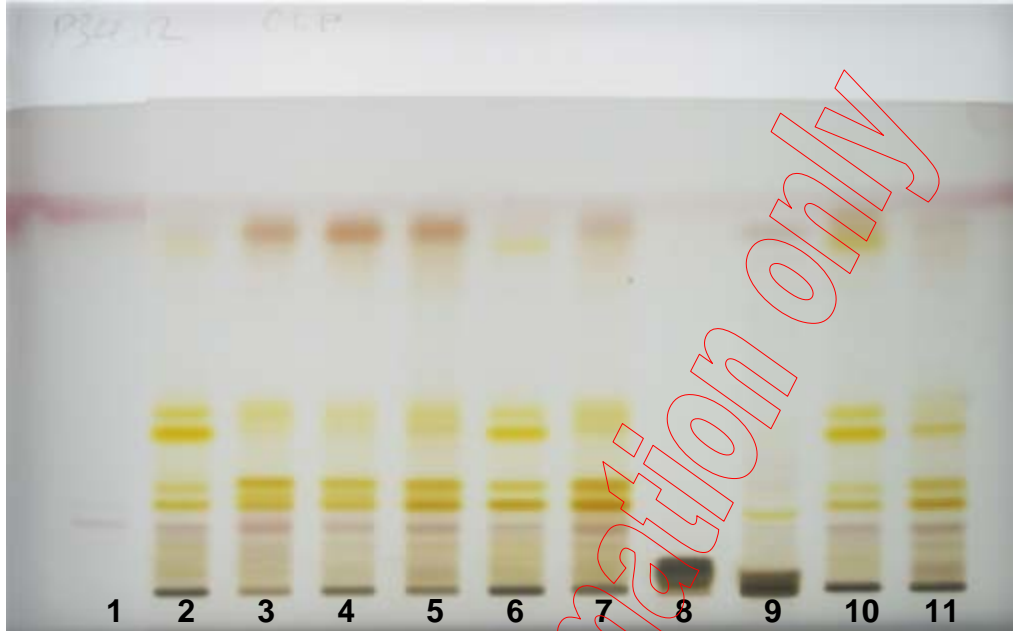

- 1: Ammonium glycyrrhizate
  - 2: Licorice root, milled (*Glycyrrhiza glabra*), Phytolab, 2701303 \*
  - 3: *Glycyrrhiza glabra* AUIZ, Received by INA 08/03 \*
  - 4: *Glycyrrhiza glabra* AUIZ, Botanical Liaisons, AV12 \*
  - 5: *Glycyrrhiza glabra*, China, Nikyang Entr.
  - 6: Commercial Licorice Slices 2 mm x 3-4 cm, China, Nikyang Entr.
  - 7: Licorice root capsules, 450 mg, Received by INA 07/03
  - 8: DGL De-glycyrrhinated Licorice extract Lozenge 400 mg, Received by INA 07/03
  - 9: Licorice + herbal blended extract (liquid), Received by INA 07/03
  - 10: *Glycyrrhiza uralensis*, Received by INA 10/03, TCM Collection No 435 \*
  - 11: *Glycyrrhiza uralensis* Fisch., China Nikyang Entr.
- \*BRM

**Accepted: YES**

**Samples on tracks 5, 6, 7, and 11 pass; samples on tracks 8 and 9 fail.**

### 5.3.2 Detection of adulteration

#### Description of experiment:

Authenticated adulterants are prepared according to section 4.1. The BRM of *G. glabra* and *G. uralensis* are prepared according to section 4.2. All samples are applied onto the same plate according to section 4.5. Following chromatography (sec.4.7) and derivatization (sec.4.8) the plates are documented (sec.4.9) and the results compared to those shown in section 4.10.

#### Acceptance criteria:

The method is specific for *G. glabra* and *G. uralensis* if the fingerprints of the adulterants are significantly different from those of the BRMs with respect to number, position, color, and intensity of bands **and** the acceptance criteria of section 5.3.1 are met.

**Results:** Test does not apply, no adulterants are known.

Copy - for information only

## **5.4 Repeatability**

### **Description of experiment:**

Three portions of the BRM are individually prepared according to section 4.2. Onto three 20x10 cm plates, three aliquots of 2  $\mu$ L of each reference solution are applied according to section 4.5. The plates are chromatographed (section 4.7) subsequently using the same chamber but fresh portions of the developing solvent and fresh filter paper. The plates are derivatized and documented according to 4.8-4.9.

The results across each plate and from plate to plate are evaluated. The average Rf values of the three eleutherosides are determined for each track on each plate.

### **Acceptance criteria:**

The Repeatability of the method is acceptable if:

All fingerprints on each plate are identical with respect to number, position, color, and intensity. Across each plate the zones – due to the same compounds – form parallel lines with no disturbance (waves or curves) **and**

The Rf values for each of the three zones on the three plates don't vary more than 0.02.

### **Results:**

All chromatograms look very similar with respect to number, position, color, and intensity of zones. No disturbances are seen.

| Rf               | P47_050223_03 | P47_050223_04 | P47_050223_05 | $\Delta$ Rf |
|------------------|---------------|---------------|---------------|-------------|
| Eleutheroside E  | 0.34          | 0.36          | 0.36          | 0.02        |
| Eleutheroside B  | 0.45          | 0.47          | 0.47          | 0.02        |
| Eleutheroside E1 | 0.61          | 0.63          | 0.63          | 0.02        |

### **Images (only detection b):**

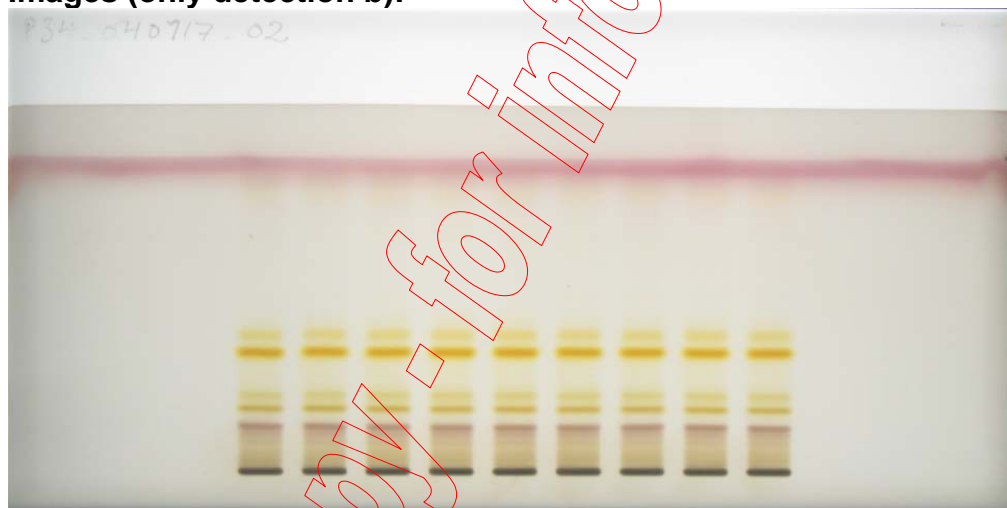

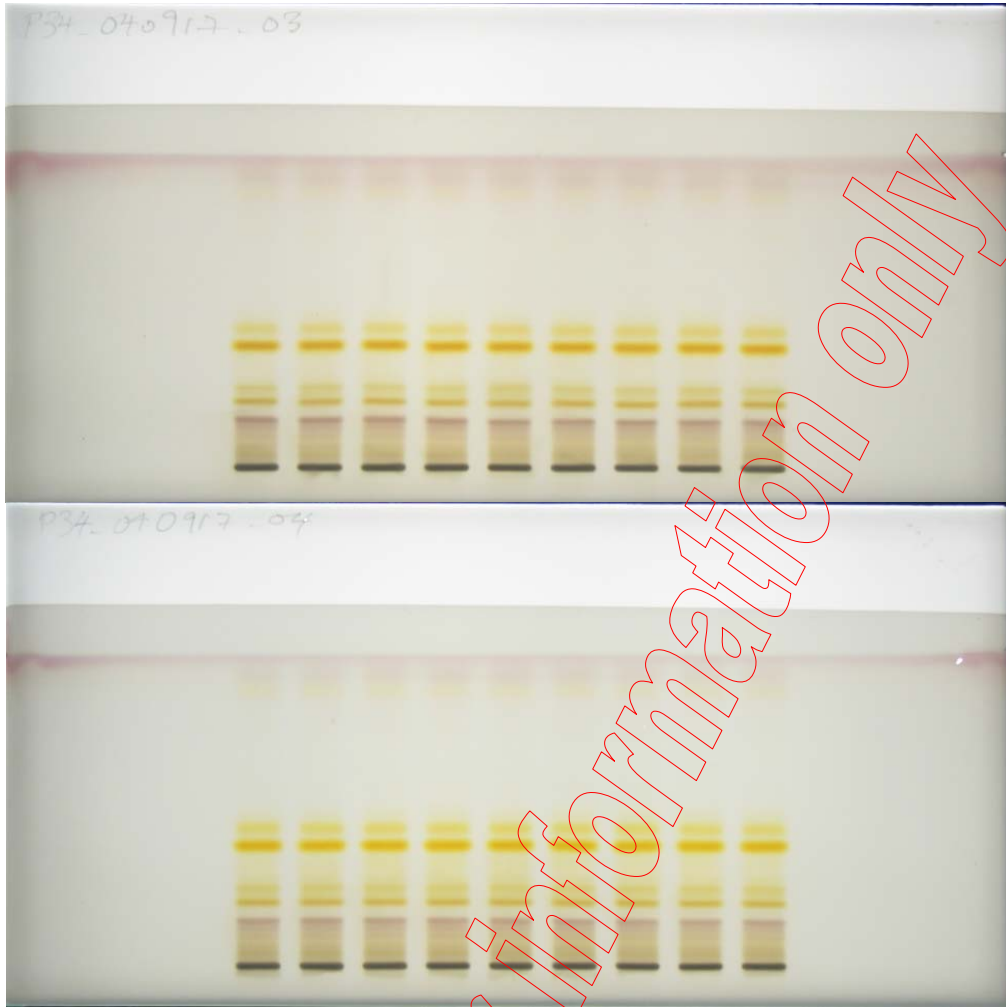

**Accepted: YES**

### **5.5 Intermediate precision**

#### **Description of experiment:**

Repeat the experiment described under 5.4 on 2 other days, with the following modifications. Only one portion of the BRM is prepared according to section 4.2. Onto one 10x10 cm plate, three aliquots of 2  $\mu$ L of the solution are applied.

The Rf values of the three eleutherosides are determined for each track on each plate (one plate prepared during experiment 5.4, 2 plates on different days) and variations of average Rf values from plate to plate are evaluated.

#### **Acceptance criteria:**

The intermediate precision of the method is acceptable if:

All fingerprints on each plate are identical with respect to number, position, color, and intensity. Across each plate the zones – due to the same compounds – form parallel lines with no disturbance (waves or curves) **and**

The average Rf values for each of the three zones on the three plates don't vary more than 0.05.

#### **Results:**

All chromatograms look very similar with respect to number, position, color, and intensity of zones. No disturbances are seen.

| Rf               | P47_050223_03<br>(Comparison) | P47_050224_01 | P47_050225_01 | $\Delta$ Rf |
|------------------|-------------------------------|---------------|---------------|-------------|
| Eleutheroside E  | 0.34                          | 0.33          | 0.34          | 0.01        |
| Eleutheroside B  | 0.45                          | 0.43          | 0.45          | 0.02        |
| Eleutheroside E1 | 0.61                          | 0.59          | 0.60          | 0.02        |

#### **Images (only detection b):**

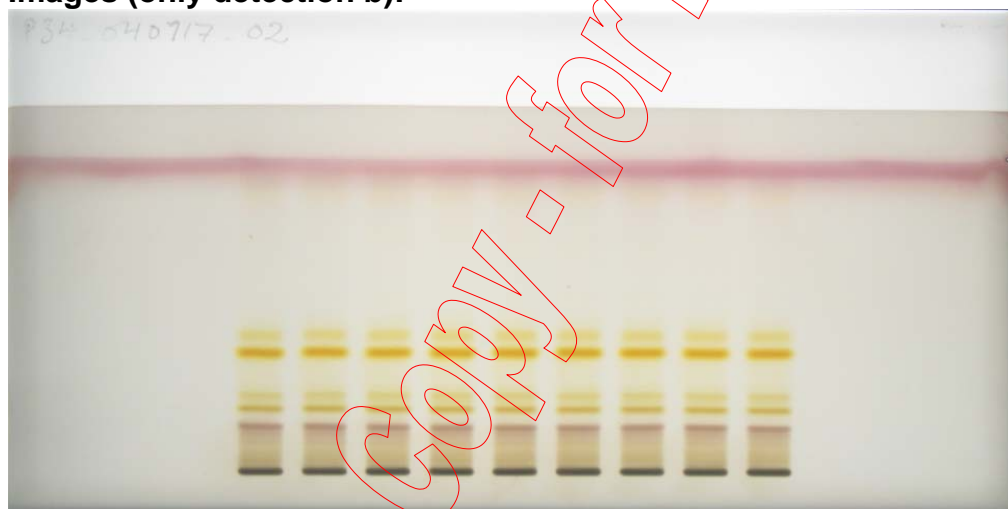



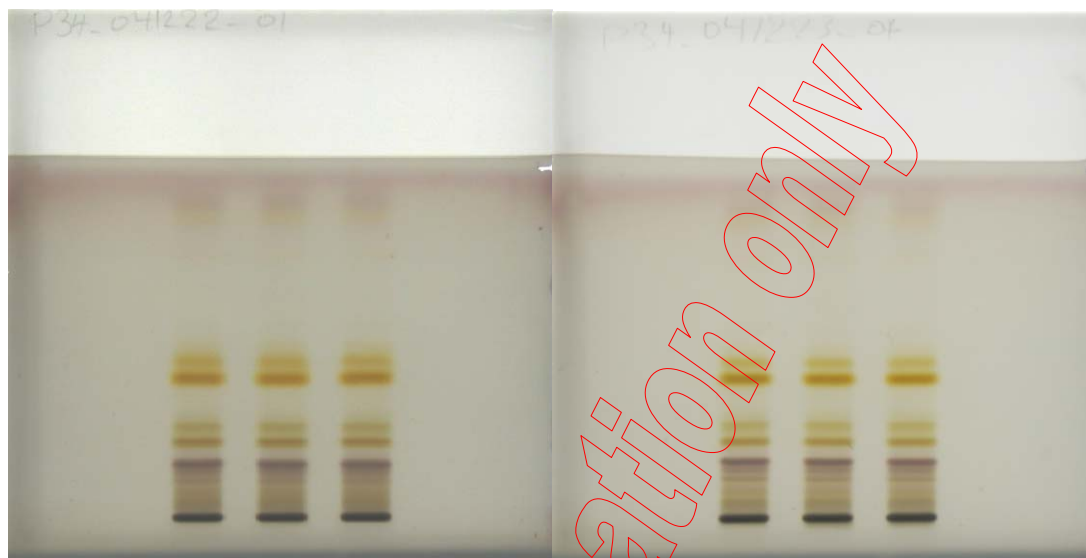

**Accepted: YES**

### **5.6 Reproducibility**

#### **Description of experiment:**

The confirmatory lab repeats the experiment described under 5.4 (Repeatability).

#### **Acceptance criteria:**

The reproducibility of the method is acceptable if:

All fingerprints on each plate are identical with respect to number, position, color, and intensity. Across each plate the zones – due to the same compounds – form parallel lines with no disturbance (waves or curves) **and** the average Rf values for each of the three zones on the three plates don't vary more than 0.02.

The reproducibility is acceptable if the Rf obtained in this test are not significantly different from those in obtained in section 5.4 (<0.05 if using plate from the same manufacturer, <0.07 for plates of different manufacturers).

#### **Results:**

All chromatograms developed by the confirmatory lab look very similar with respect to number, position, color, and intensity of zones. No disturbances are seen. The color/brightness of the image differs slightly from the image made in the primary lab. This could be due to different documentation devices and settings.

| Rf               | A154-20050309-001 | A154-20050309-002 | A154-20050309-003 | $\Delta$ Rf | P47_050223_03 (Comparison) | $\Delta$ Rf |
|------------------|-------------------|-------------------|-------------------|-------------|----------------------------|-------------|
| Eleutheroside E  | 0.34              | 0.33              | 0.35              | 0.02        | 0.34                       | 0.01        |
| Eleutheroside B  | 0.45              | 0.45              | 0.46              | 0.01        | 0.45                       | 0.01        |
| Eleutheroside E1 | 0.61              | 0.61              | 0.62              | 0.01        | 0.61                       | 0.01        |

**Images (only detection b):**

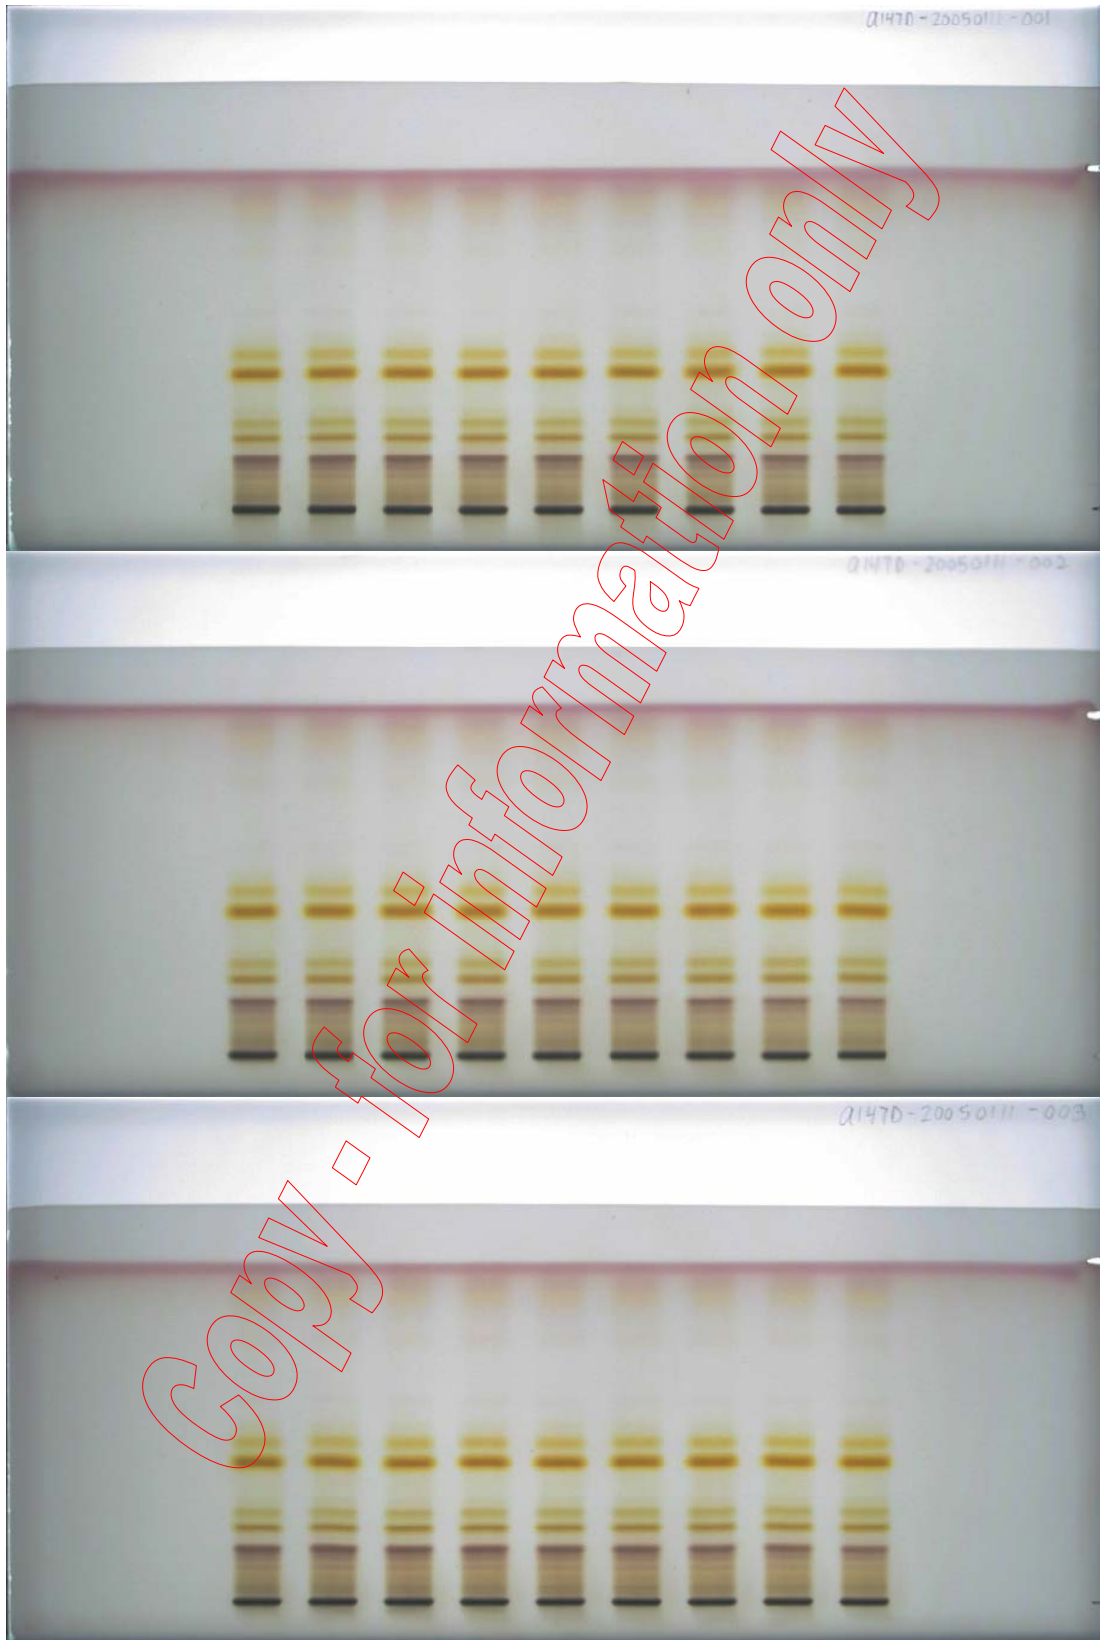

Accepted: YES

## **5.7. Robustness**

### **5.7.1 Chamber type**

#### **Description of experiment:**

The method is executed according to section 4 using only one BRM. Instead of a Twin Trough Chamber a Flat Bottom Chamber of comparable size is used.

#### **Acceptance criteria:**

The fingerprints obtained in both chambers are similar with respect to number, position, color, and intensity of zones. The Rf values obtained in this test are not significantly different from those described in section 4.10 (<0.05). In the case of differences between the results the use of a Flat Bottom Chamber must be excluded.

#### **Results:**

No difference is seen when the plate is developed in a Flat Bottom Chamber

| Rf               | Image 4.10 | P47_050225_02 | $\Delta Rf$ |
|------------------|------------|---------------|-------------|
| Eleutheroside E  | 0.34       | 0.33          | 0.01        |
| Eleutheroside B  | 0.45       | 0.43          | 0.02        |
| Eleutheroside E1 | 0.60       | 0.58          | 0.02        |

#### **Image(s):**

Twin Trough Chamber

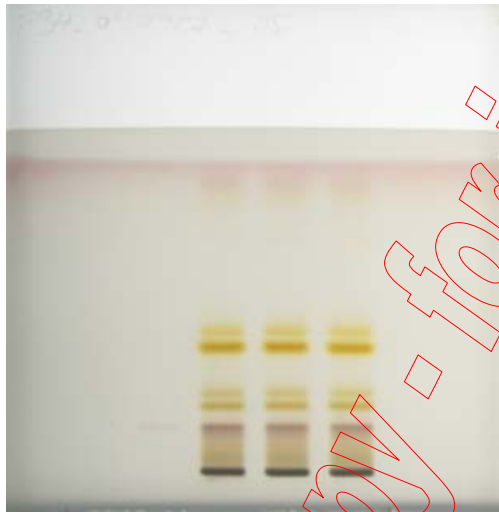

Flat Bottom Chamber

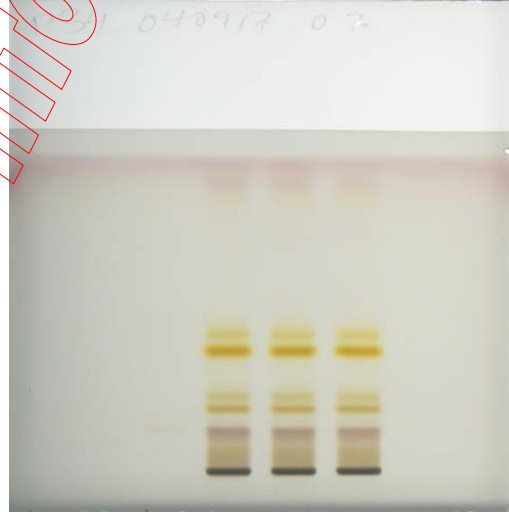

**Accepted: YES**

### 5.7.2 Developing distance

#### Description of experiment:

The method is executed according to section 4 using only the BRM.  
The developing distance is increased to 80 mm from the lower edge of plate.

#### Acceptance criteria:

The fingerprints obtained with different developing distances are similar with respect to number, position, color, and intensity of zones. The Rf values obtained in this test are not significantly different from those described in section 4.10 ( $<0.05$ ). In the case of differences between the results the developing distance of more than 70 mm yields invalid results.

#### Results:

The separation is not affected by the increased developing distance. Slightly lower Rf values are observed.

| Rf               | Image 4.10 | P47_050223_07 | $\Delta Rf$ |
|------------------|------------|---------------|-------------|
| Eleutheroside E  | 0.34       | 0.33          | 0.01        |
| Eleutheroside B  | 0.45       | 0.44          | 0.01        |
| Eleutheroside E1 | 0.60       | 0.58          | 0.02        |

#### Image(s):

70 mm

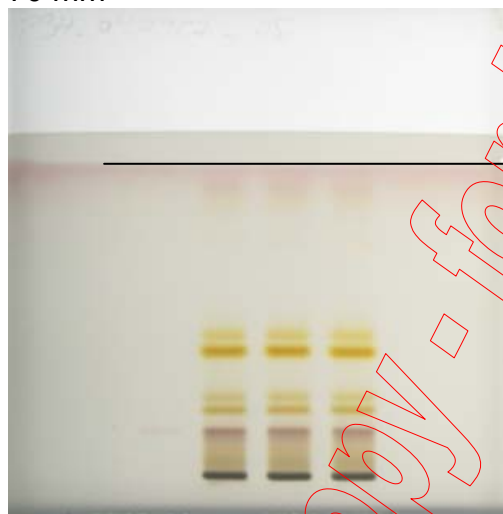

80 mm

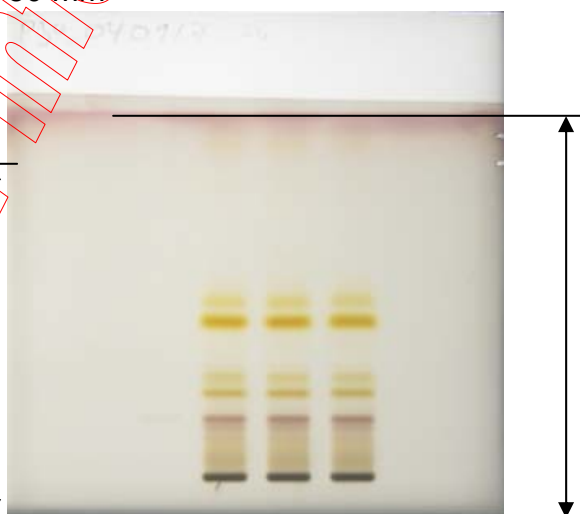

Accepted: YES

### 5.7.3 Waiting times

Because the sample is stable on the plate, in solution, and during chromatography, and the derivatization is not critical, this experiment was not performed in this example. For details see section 5.2.1-5.2.3.

## 5.7.4 Relative humidity

### Description of experiment:

Four plates are prepared according to section 4 using only one BRM. Prior to chromatography (4.6), the plates are conditioned over salt solutions and/or sulfuric acid for adjusting different relative humidity. Relative humidity covering a range of about 20-60% rH should be tested.

Alternatively, results of plates developed under different relative humidity are compared.

### Acceptance criteria:

The fingerprints obtained under different relative humidity are similar with respect to number, position, color, and intensity. In this case the relative humidity does not affect the result. In the case of differences of the results, the method may require the control of relative humidity.

### Results:

Only small variations in Rf values at low-medium rel. humidity (16-58%). Band broadening and separation difference at high humidity (75%). The chromatogram should not be developed without humidity control when the surrounding relative humidity exceeds 60%.

| Rf               | 16%  | 32% | 58%   | 75%    |
|------------------|------|-----|-------|--------|
| Eleutheroside E  | 0.33 |     | 0.36  | 0.44   |
| Eleutheroside B  | 0.43 |     | 0.43* | 0.57** |
| Eleutheroside E1 | 0.57 |     | 0.6   | 0.66   |

### Images:

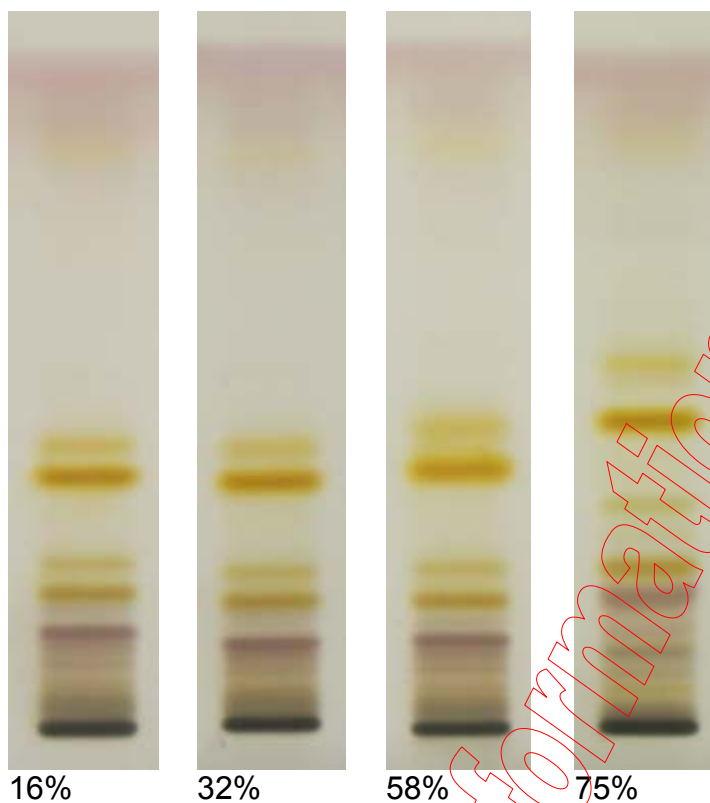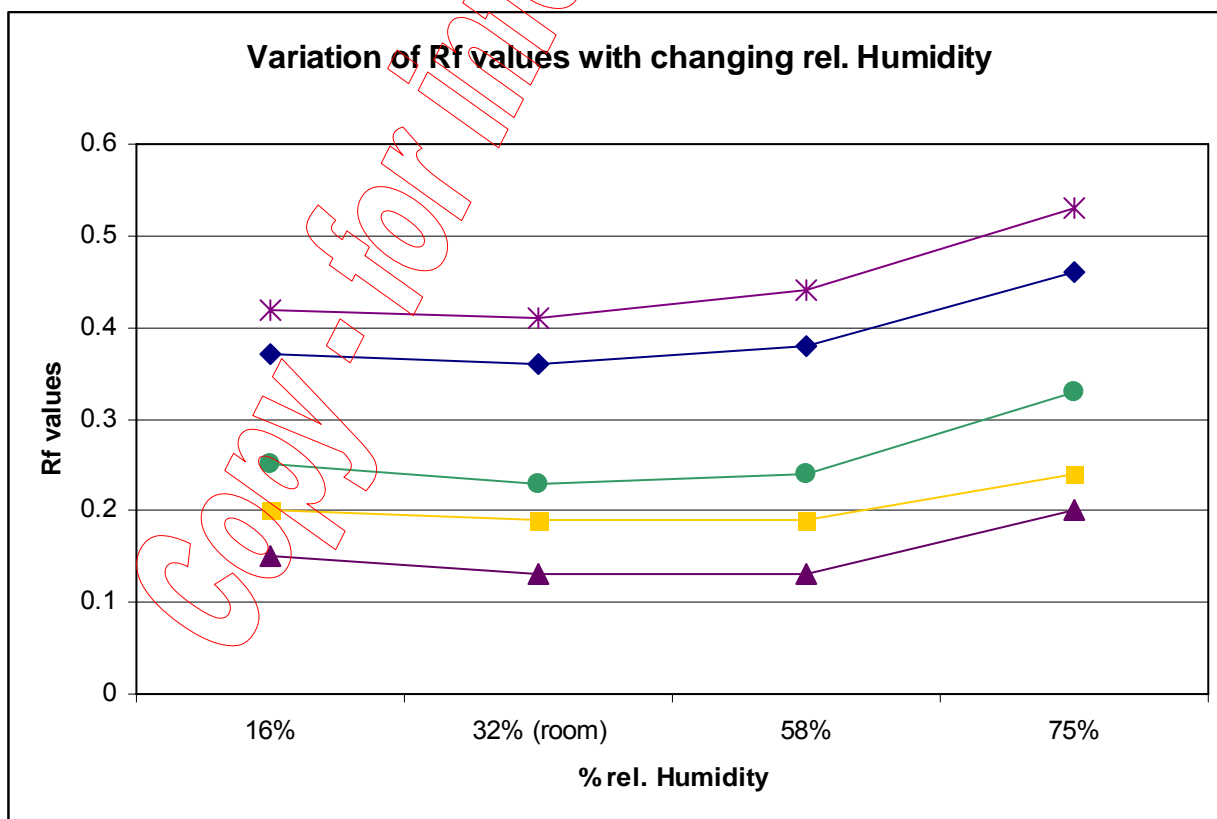

Accepted: YES

**6. Conclusions, Approvals, and Signatures**

**6.1 Conclusions of primary lab**

Date:

Analyst of primary lab:

**6.2 Conclusions of substantiating lab**

Date:

Analyst of substantiating lab:

**6.3 Conclusions and approval of reviewer**

Date:

Reviewer:

**6.4. Final approval of study director**

Date:

Study director:

Copy - for information only
