# Supplementary material
Source: PubMed Central journal article supplement (PMC2662610)
Supplement: NIHMS87256-supplement-7a.pdf [file NIHMS87256-supplement-7a.pdf]

| Date        | Analyst      | Project No. | Project Name |
|-------------|--------------|-------------|--------------|
| 21.Mar.2002 | Anne Schibli | P08         | Kava         |

## Evaluation and optimization of methods for identification of Kava

### 1. Analytical goal:

Develop a method for the identification of Kava rhizome, which separates the six available kavalactones.

### 2. Paper review of methods from literature:

| Literature (see appendix)  | Scope  | Mobile phase / Stationary phase / derivatization                                           | Refer to Figure # below |
|----------------------------|--------|--------------------------------------------------------------------------------------------|-------------------------|
| Wagner and Blatt           | Kawain | n-Hexane – Ethyl acetate (70:30) / double development on Alox plate / anisaldehyde reagent | 1a                      |
| Pharmacopoeial forum 28(1) | Kawain | n-Hexane – Ether (30:70) / double development on Alox plate / anisaldehyde reagent         | 1b                      |

### 3. Experimental evaluation of selected methods

#### 3.1 Materials

##### 3.1.1 Samples

| Sample name    | Source / Batch                  | Authentication | Notes      |
|----------------|---------------------------------|----------------|------------|
| Kava Kava root | Removed proprietary information | No             | old sample |

##### 3.1.2 Standards (marker compounds)

| Name               | Source                 |
|--------------------|------------------------|
| D/L-Kavain         | ChromaDex 01-11300-101 |
| Dihydrokavain      | ChromaDex 01-04476-101 |
| Methysticin        | ChromaDex 01-13860-101 |
| Dihydromethysticin | ChromaDex 01-04477-101 |
| Yangonin           | ChromaDex 01-25010-101 |
| Desmethoxyyangonin | ChromaDex 01-04236-101 |

##### 3.1.3 TLC plates

| Name, Type            | Source  |
|-----------------------|---------|
| TLC Plate 20x20, Alox | Unknown |

### 3.2 Results and discussion

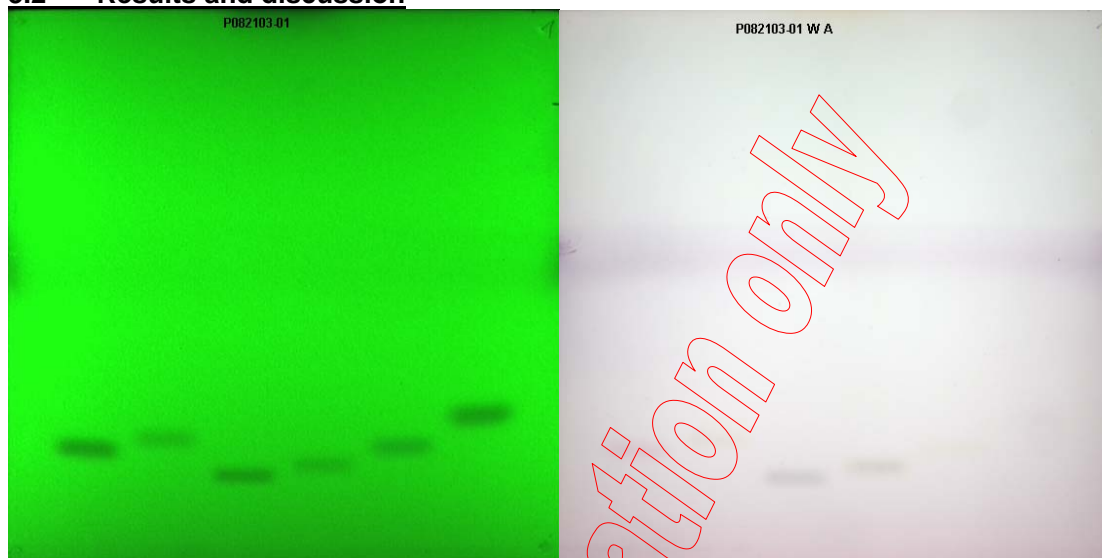

Figure 1a: Wagner [only single development, 2h dev. time]

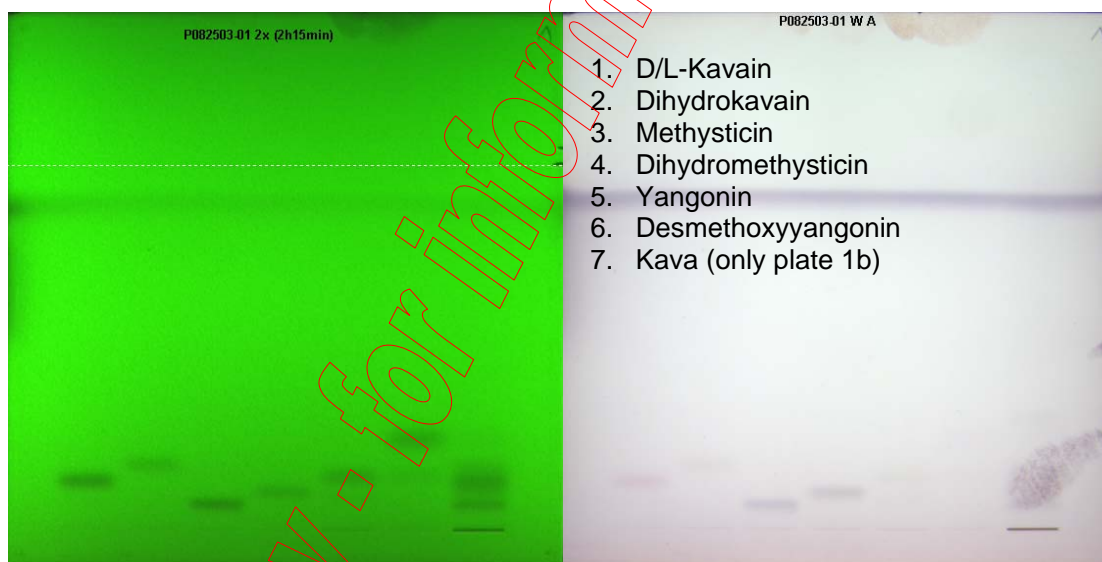

Figure 1a: USP-PF

### 3.3 Conclusions:

Check one

... Method from literature is suitable → continue with section 5

X Method "USP-PF" needs optimization → continue with section 4

... No suitable method is found → refer to SOP 70.002.01 "Evaluation, development, optimization, and validation of methods for identification of medicinal plants and products thereof".

## 4. Method optimization

### 4.1 Sample preparation

### 4.2 HPTLC methodology

### 4.3 Derivatization

#### **4.4 Mobile phase**

Substitution of ether with TBME, and increasing of the ether ratio.

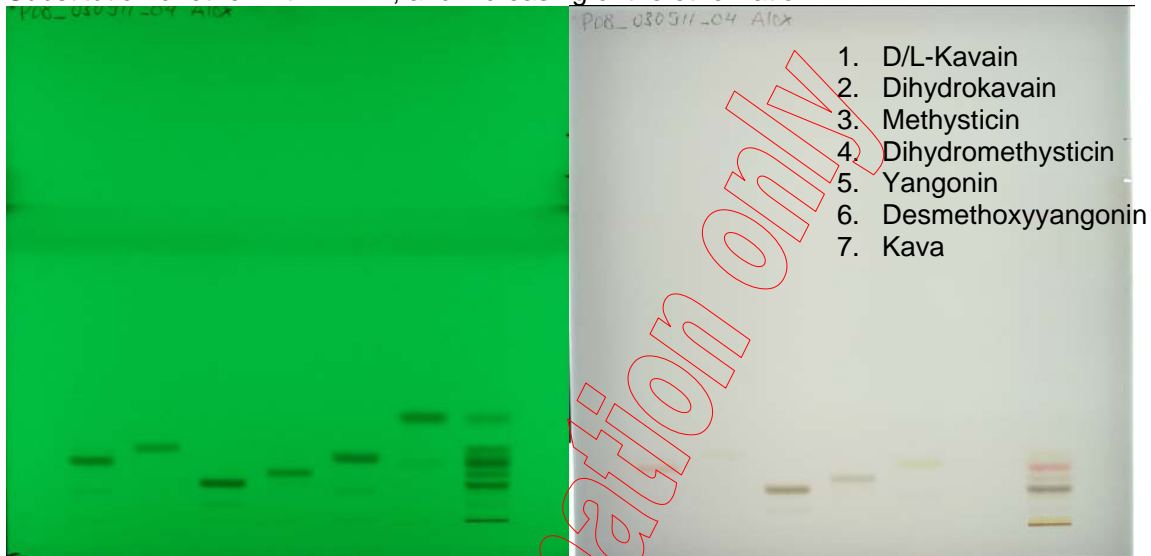

n-Hexane - TBME (1:1) double development.  
The separation is improved but still not sufficient.

#### **4.5 Method including all optimized parameters**

#### **4.6 Conclusions**

Check one

... Analytical goals achieved → continue with section 5

X Analytical goals not achieved → refer to SOP 70.002.01 "Evaluation, development, optimization, and validation of methods for identification of medicinal plants and products thereof".

#### **5. Evaluation of stability (pre-validation)**

##### **5.1 Stability of analyte during chromatography**

##### **5.2 Stability of analyte in solution and on the plate**

##### **5.3 Stability of result (for documentation)**

##### **5.4 Conclusion**

... Stability tests passed → Use FO 70.002.02 "Method to be validated" for method write up, then validate method according to SOP 70.002.01 "Evaluation, development, optimization, and validation of methods for identification of medicinal plants and products thereof". If the method is not intended to be validated, use FO 70.002.06 "Application Note" for method write up.

... Stability tests failed → restart with section 4 or refer to SOP 70.002.01 "Evaluation, development, optimization, and validation of methods for identification of medicinal plants and products thereof".

Printed

Date:

Signed:

Date of review:

Name:

Title:

Signature:
